1 **Title: Differential regulation of activation and differentiation processes**  
2 **in CD4+ T cell populations and their single-cell level heterogeneity**

3

4

5

6 **Authors:**

7 Alla Bradley<sup>1</sup>, Tetsuo Hashimoto<sup>1</sup> and Masahiro Ono<sup>2§</sup>

8

9 **Affiliations:**

10 <sup>1</sup> Faculty of Life and Environmental Sciences, University of Tsukuba,

11 Tsukuba, Japan

12 <sup>2</sup> Department of Life Sciences, Faculty of Natural Sciences, Imperial College

13 London, Sir Alexander Fleming Building, Imperial College Road, London,

14 SW7 2AZ, United Kingdom

15

16 § Address correspondence and reprint requests to Dr Masahiro Ono,

17 Department of Life Sciences, Sir Alexander Fleming Building, Imperial College

18 Road, South Kensington, London, SW7 2AZ, United Kingdom. E-mail

19 address: [m.ono@imperial.ac.uk](mailto:m.ono@imperial.ac.uk)

20

21

1 **Abstract**

2  
3 In T cells, T cell receptor (TCR) signalling initiates downstream transcriptional  
4 mechanisms for T cell activation and differentiation. Foxp3-expressing  
5 regulatory T cells (Treg) require TCR signals for their suppressive function  
6 and maintenance in the periphery. It is, however, unclear how TCR signalling  
7 controls the transcriptional programme of Treg. Since most of studies  
8 identified the transcriptional features of Treg in comparison to naïve T cells,  
9 the relationship between Treg and non-naïve T cells including memory-  
10 phenotype T cells (Tmem) and effector T cells (Teff) is not well understood.  
11 Here we dissect the transcriptomes of various T cell subsets from  
12 independent datasets using the multidimensional analysis method Canonical  
13 Correspondence Analysis (CCA). We show that resting Treg share gene  
14 modules for activation with Tmem and Teff. Importantly, Tmem activate the  
15 distinct transcriptional modules for T cell activation, which are uniquely  
16 repressed in Treg. The activation signature of Treg is dependent on TCR  
17 signals, and is more actively operating in activated Treg. Furthermore, by  
18 analysing single cell RNA-seq data from tumour-infiltrating T cells, we  
19 identified the common shared transcriptional modules for T cell activation,  
20 including *CTLA-4*, in activated Treg and activated Teff. Moreover, we  
21 identified distinct FOXP3-driven and T follicular helper-like transcriptional  
22 modules in activated FOXP3+ Treg and FOXP3- Teff, respectively.  
23 Collectively, we reveal the multidimensional identities and single cell-level  
24 heterogeneity of Treg, identifying the differential regulation of the activation  
25 and differentiation gene modules in Treg, Tmem and Teff during homeostasis  
26 and in the tumour microenvironment.

## 1 Introduction

2 T cell receptor (TCR) signalling activates NFAT, AP-1, and NF- $\kappa$ B (1), which  
3 induces the transcription of Interleukin (IL)-2 and IL-2 receptor (R)  $\alpha$ -chain  
4 (*Il2ra*, CD25). IL-2 signalling induces further T cell activation, proliferation and  
5 differentiation (2). In addition, IL-2 signalling has key roles in immunological  
6 tolerance (2). This is partly mediated through CD25-expressing regulatory T  
7 cells (Treg), which suppress the activities of other T cells (3). Intriguingly, TCR  
8 signalling also induces the transient expression of FoxP3, the lineage-specific  
9 transcription factor of Treg (4), in any T cells in humans (5), and in mice in the  
10 presence of IL-2 and TGF- $\beta$  (6). These suggest that FoxP3 can be actively  
11 induced as a negative feedback mechanism for the T cell activation process,  
12 especially in inflammatory conditions in tissues (7). Thus, the T cell activation  
13 processes may dynamically control Treg phenotype and function during  
14 immune response and homeostasis.

15 In fact, TCR signalling plays a critical role in Treg. Studies using TCR  
16 transgenic showed that Treg require TCR activation for *in vitro* suppression  
17 (8). Foxp3 binds to the enhancer regions that have been opened by TCR  
18 signals, which explains a major part of the Treg-type chromatin structure (9).  
19 In fact, continuous TCR signals are required for Treg function, because the  
20 conditional deletion of the TCR- $\alpha$  chain in Treg abrogates the suppressive  
21 activity of Treg and eliminates their activated or effector-Treg type phenotype  
22 (10, 11). It is, however, unclear how TCR signals contribute to the Treg-type  
23 transcriptional programme, and whether TCR signals are operating in all Treg

1 cells or whether these are required only when Treg suppress the activity of  
2 other T cells.

3 Heterogeneity of Treg has been previously addressed through classifying  
4 Treg into subpopulations, according to the origin (thymic Treg, peripheral  
5 Treg, visceral adipose tissue Treg (12)), the transcription factor expression  
6 and ability to control inflammation (Th1-Treg (13) and Th2-Treg (14), and T  
7 follicular regulatory T cells (15)), and their activation status (activated Treg/  
8 effector Treg (eTreg), resting Treg, and memory-type Treg (16)). Among these  
9 Treg subpopulations, of interest is eTreg, which are activated and functionally  
10 mature Treg. Murine eTreg can be identified by memory/ activation markers  
11 such as CD44, CD62L, and GITR (16, 17), and their differentiation is  
12 controlled by the transcription factors Blimp-1, IRF4 and Myb (18, 19). Human  
13 Treg can be classified into naïve Treg (CD25+CD45RA+Foxp3+) and eTreg  
14 (eTreg, CD25+CD45RA-Foxp3+) (20). However, our recent computational  
15 study showed that classical gating approach is not effective for understanding  
16 multidimensional data, and that marker expression data may be rather  
17 effectively analysed by the computational clustering approaches that aim to  
18 understand the dynamics of marker expressions in Treg (21). Furthermore,  
19 the recent advancement of single cell technologies has opened the door to  
20 address the heterogeneity of Treg by their gene profiles at the single cell  
21 level.

22 When addressing the single cell level heterogeneity, it is critical to analyse  
23 activated effector T cells (Teff) and memory-like T cells (memory-phenotype T  
24 cells; Tmem) together with Treg. The surface phenotype of Tmem is

1 CD44<sup>high</sup>CD45RB<sup>low</sup>CD25<sup>-</sup> (22), which is similar to CD25<sup>-</sup> Treg, apart from  
2 Foxp3 expression and suppressive activity (23, 24). In addition, activated  
3 effector T cells (Teff) express CD25 and CTLA-4 (25), the latter of which is  
4 also known as a Treg marker (26). While Tmem may include both antigen-  
5 experienced memory T cells (27) and self-reactive T cells (28). In fact,  
6 CD44<sup>high</sup>CD45RB<sup>low</sup> Tmem do not develop in TCR Tg mice with the *Rag*  
7 deficient background, indicating that they require agonistic TCR signals in the  
8 thymus (29). In addition, a study using a fate-mapping approach showed that  
9 a minority of Treg naturally lose Foxp3 expression and join the the Tmem  
10 fraction (30). These suggest that, upon encountering with cognate self-  
11 antigens, self-reactive T cells, which include Tmem and Treg, express and  
12 sustain Foxp3 expression as a negative feedback mechanism for strong TCR  
13 signals (7). Thus, Treg have a close relationship with Tmem and Teff.  
14 However, since most studies used naïve T cells (Tnaïve) as the control for  
15 Treg, many of known “Treg” features may be in fact shared with Tmem and  
16 Teff.

17 Multidimensional analysis is an effective approach to address this problem,  
18 allowing to systematically investigate relationships between more than 2  
19 populations (e.g. based on transcriptional similarities) (31). The prototype  
20 methods include Principal Component Analysis (PCA), Correspondence  
21 Analysis (CA) (32) and Multidimensional Scaling (33). In the application to  
22 genomic data, these methods measure distances (i.e. similarities) between  
23 samples and/or genes using different metrics, and thereby visualise the  
24 relationships between samples and/or genes in a reduced dimension, typically  
25 either in 2- or 3-dimensions, providing means to explore and investigate data

1 (31). However, these multidimensional methods are often not sufficiently  
2 powerful for hypothesis-driven research, and our previous studies developed  
3 a transcriptome analysis method using a variant analysis of CA, Canonical  
4 Correspondence Analysis (CCA) for microarray data (31) and RNA-seq data  
5 (34). In this approach, two transcriptome data are canonically analysed: the  
6 correlations between cell samples in one dataset and the immunological  
7 processes in another dataset are analysed based on their correlations to  
8 individual genes. Briefly, CCA uses a linear regression to identify the  
9 interpretable part (constrained space) of main data by explanatory variables,  
10 and visualises similarities between genes, cells, and explanatory variables  
11 using a singular value decomposition (SVD) solution within the interpretable  
12 space (34). Thus, CCA enables to investigate and identify the unique features  
13 of each T cell population, visualising the relationship between T cell  
14 populations.

15 In this study, we investigate the multidimensional features of Treg in  
16 comparison to other CD4<sup>+</sup> T cells including Teff, Tmem, and naïve T cells  
17 under normal or pathological conditions. Here we aim to identify the  
18 differential regulation of transcriptional modules for T cell activation and  
19 differentiation in these populations, and to reveal systems and molecular  
20 mechanisms behind the differential regulation. Furthermore, using a new  
21 single cell CCA approach, we investigate the single-cell level heterogeneity of  
22 CD4<sup>+</sup> T cells including Treg and effector T cells, identifying the differentially  
23 regulated gene modules and the dynamic and gradational changes in  
24 transcriptomes of individual T cells.

25

## 1 **Materials and Methods**

2

### 3 *Conventional CCA (Gene-oriented analysis)*

4 CCA canonically analyses two independent microarray or RNA-seq datasets  
5 (34). Briefly, gene expression data of the standardised main dataset (**S**) is  
6 linearly regressed onto the explanatory variable(s) (**D**), which identifies the  
7 interpretable part of the main dataset (“Constrained data”, **S\***). When only  
8 one explanatory variable is used, the CA algorithm of CCA assigns numerical  
9 values to cell samples and genes so that the dispersion of samples is  
10 maximised (uncorrelated information components), providing a one-  
11 dimensional solution (34). In order to use the solution as a scoring system,  
12 CCA score (i.e. Axis 1 score) was multiplied by the single biplot value, which  
13 indicates positive or negative correlation to Axis 1, which ensures that cells  
14 and genes with high scores have high positive correlations to the explanatory  
15 variable. When two or more explanatory variables are used, the CA algorithm  
16 then performs SVD on **S\***, creating new matrices (i.e. sample and gene score  
17 matrices). These scores are sorted into new uncorrelated axes  $\alpha_k$ , along  
18 which the entire set of scores generated by SVD, are distributed. The first axis  
19 holds the greatest amount of information (largest variations, precisely, *inertia*).  
20 The map approach enables the comparison of more than two explanatory  
21 variables, while the regression process in CCA allows the analysis across two  
22 different experiments (34). Biplot values of the CCA result are shown by  
23 arrows on the CCA map. CCA provides a map that shows the correlations  
24 between samples of interest, explanatory variables, and genes. Highly  
25 correlated components are closely positioned on the map.

1 In the application of CCA to population data, transcriptomic datasets of  
2 peripheral CD4+ T cells (including Treg, naïve, memory, draining LN and non-  
3 dLN and tissue effector CD4+ T cells) were processed by CCA and the cross-  
4 level relationships between components at three different levels, namely,  
5 immunological process, gene and cell, were analysed. Note that the same  
6 genes must be used in both transcriptome dataset matrices (intersect). The  
7 main dataset is projected onto the explanatory variable dataset, thus the  
8 genes in common to both datasets comprise the interpretable part of the main  
9 data. Mathematical operation implemented in the CCA algorithm produces  
10 immunological process (explanatory variable), gene and cell sample scores.  
11 The results are visualized as the 3-dimensional CCA solution on the CCA  
12 map (i.e. CCA triplot) that shows the relationships between cell subsets,  
13 genes and immunological processes.

14

15 *Single cell data pre-processing and single cell CCA (single-cell oriented*  
16 *analysis)*

17 RNA-seq expression data of GSE72056 was obtained from single-cell  
18 suspension of tumour cells with unknown activation and differentiation  
19 statuses were sequenced by RNA-seq (35). Genes with low variances and  
20 low maximal values were excluded. In order to identify CD4+ T cells, single  
21 cell data were filtered by the expression of *CD4* and *CD3E* to obtain only the  
22 *CD4+CD3E+* single cells, and also by k-means clustering of PCA gene plot to  
23 exclude outlier cells (21) for subsequent analysis.



1 In the application of CCA to single cell data, importantly, the same single cells  
2 are used in both main data and the explanatory variables (i.e. selected  
3 genes). The main dataset is projected onto the explanatory variables,  
4 visualising the relationships between single cells, genes and explanatory  
5 variables, which represent major activation/differentiation processes in the  
6 dataset.

7

#### 8 *Explanatory variables for conventional CCA*

9 Explanatory variables for CCA were prepared as follows. Differentially-  
10 expressed genes were selected by a moderated t-test result using the  
11 Bioconductor package, *limma*. The top-ranked differentially expressed genes  
12 (according to their *p*-values) were used for making the explanatory variables.  
13 The T cell activation explanatory variable were defined by the difference in  
14 gene expression between anti-CD3/CD28-stimulated (17 h) CD4<sup>+</sup> T cells and  
15 untreated CD4<sup>+</sup> T cells from GEO42276 (36). Precisely, genes were selected  
16 by FDR <0.01 and log 2 fold change (> 1 or < -1) in the comparison of the  
17 gene expression profile of the activated and resting T cells. For Figure 1A, the  
18 expression data of GSE15907 (37) was regressed onto the log2 fold change  
19 of activated CD4<sup>+</sup> T cells (17 h after activation) and naïve CD4<sup>+</sup> T cells from  
20 GSE42276 as 'T cell activation signature' explanatory variable, and  
21 Correspondence Analysis was performed for the regressed data and the  
22 correlation analysis was done between the new axis and the explanatory  
23 variable. For Figure 1C-D, the expression data of GSE15907 (37) was  
24 regressed onto the 'T cell activation signature' explanatory variable described

1 above, in combination with retrovirally gene-transduced T cells for Foxp3 and  
2 Runx1 effects (GSE6939 (38)): the log2 fold change of Foxp3-transduced and  
3 empty vector-transduced CD4+T cells as the 'Foxp3 effects' explanatory  
4 variable, and a log2 fold change of Runx1-transduced and empty vector-  
5 transduced CD4+T cells as 'Runx1 effects' explanatory variable.

6 Correspondence Analysis was performed for the regressed data and the  
7 correlation analysis was done between the new axis and the explanatory  
8 variable.

9

#### 10 Choice of explanatory variables by SC4A

11 SC4A aims to identify a set of genes that make the dispersion of cell  
12 populations maximum in the CCA solution. To achieve this, all the  
13 combinations of genes will be used as explanatory variables and tested for  
14 discriminating each two populations using CCA. During each combinatorial  
15 cycle, two genes are chosen from the total selected genes for all defined  
16 single-cell populations in the main dataset and tested for their correlations to  
17 one defined cell population vs all other T cells. In the analysis of Figure 8, the  
18 following two cell populations were analysed by the combinatorial CCA: (1)  
19 Activated T cells vs Resting T cells; (2) FOXP3+ cells vs FOXP3- cells; (3)  
20 BCL6+ cells (as Tfh-like T cells) vs BCL6- cells. The most correlated gene to  
21 each population (Activated T cells, Resting T cells, FOXP3+ cells, or BCL6+  
22 cells) was identified, and these 4 genes were used as explanatory variables in  
23 the final output of SC4A in Figure 8.

24

## 1 *Data pre-processing and other statistical methods*

2 All microarray datasets were downloaded from GEO site, and normalized,  
3 where appropriate using the Bioconductor package *Affy*. Data were arranged  
4 into an expression matrix where each row corresponds with gene expression  
5 for each gene and each column corresponds with cell phenotype (sample).  
6 Data were log<sub>2</sub>-transformed and values above log<sub>2</sub>(10) were used for  
7 analysis. Differentially expressed genes (DEG) the TCR KO dataset and the  
8 aTreg dataset were identified by a moderated t-statistics. DEG for activated  
9 CD44<sup>hi</sup> and resting CD44<sup>lo</sup> Treg were combined. The CRAN package *vegan*  
10 was used for the computation of CCA. Gene scores used the *wa* scores of the  
11 CCA output by *vegan*. The Bioconductor package *limma* was used to perform  
12 a moderated t-test. RNA-seq data were preprocessed, normalised, and log-  
13 transformed using standard techniques (34).

14 Heatmaps were generated the CRAN package *gplots*. Venn diagram was  
15 generated using the R code, *overLapper.R*, which was downloaded from the  
16 Girke lab at Institute for Integrative Genome Biology  
17 ([http://faculty.ucr.edu/~tgirke/Documents/R\\_BioCond/My\\_R\\_Scripts/overLapper.R](http://faculty.ucr.edu/~tgirke/Documents/R_BioCond/My_R_Scripts/overLapper.R)).  
18 Gene lists were compared for enriched pathways in the REACTOME  
19 pathway database using the Bioconductor packages *ReactomePA* and  
20 *clusterProfiler*. Violin plots were generated by the Bioconductor package  
21 *ggplot2*. The inside part of the violin plot shows the median and interquartile  
22 range (IQR) of the original gene expression data. The lineage curve was  
23 constructed by clustering SC4A/CCA sample scores using an expectation–  
24 maximization (EM) algorithm (39), and the nodes of these clusters were

- 1 identified by constructing a minimum spanning tree using the Bioconductor
- 2 package *Slingshot* (40).
- 3

1

## 2 **Results**

3 *Identification of the Foxp3-independent activation signature in Treg and*

4 *memory-phenotype T cells*

5 Firstly, we investigated how T cell activation-related genes are differentially  
6 regulated in resting Treg and other CD4<sup>+</sup> T cell populations including Tmem  
7 and Teff. To address this multidimensional problem, we applied CCA to the  
8 microarray dataset of various CD4<sup>+</sup> T cells using the explanatory variable for  
9 the T cell activation process, which was obtained from the microarray dataset  
10 that analysed resting and activated conventional T cells (“T cell subset data”  
11 and “T cell activation data” in **Table 1**). Thus, we aimed to visualise the cross-  
12 level relationships between genes, the T cell populations, and the T cell  
13 activation process (**Figure 1A**). Using the single explanatory variable, the T  
14 cell activation process, the solution of CCA is one-dimensional and the cell  
15 sample scores of CCA (represented by Axis 1) provides “T cell activation  
16 score” (see Methods), indicating the level of activation in each cell population  
17 relative to the prototype signature of T cell activation, as defined by the  
18 explanatory variable *Tact*. All the naïve T cell populations had low Axis 1  
19 values (i.e. Foxp3<sup>-</sup> T naïve cells (Tnaive); Tnaive, and non-draining lymph  
20 node (dLN) T cells from BDC TCR transgenic (Tg) mice, which develop type I  
21 diabetes). In contrast, Foxp3<sup>+</sup> Treg, Tmem, and tissue-infiltrating Teff in the  
22 pancreas from BDC Tg (i.e. with inflammation in the islets) had high scores  
23 (**Figure 1B**). These results indicate that Treg are as “activated” as Tmem and  
24 tissue-infiltrating activated Teff at the transcriptomic level by CCA.

1 Next, we addressed whether the highly “activated” status of Treg is dependent  
2 on Foxp3. Since Foxp3 suppresses Runx1-mediated transcriptional activities  
3 (38), we investigated the same T cell population dataset using the following  
4 three explanatory variables: T cell activation (Tact), retroviral *Foxp3*  
5 transduction (*Foxp3*) and *Runx1* transduction (*Runx1*) (see Methods). The  
6 CCA solution was 3-dimensional, while the first two axes explained the  
7 majority of variance (98.8%, **Figure 2A**). As expected, Tmem, tissue-  
8 infiltrating Teff and Treg had low negative values and showed high  
9 correlations to T cell activation (Tact) in Axis 1, whereas only Treg had high  
10 correlations with the Foxp3 variable in Axis 2, while Tmem and Teff were  
11 correlated with the Runx1 variable in Axis 2 (**Figure 2A**). By analysing the  
12 gene space of the CCA solution, genes in the lower left quadrant (i.e. negative  
13 in both Axes 1 and 2) were enriched with the genes that are involved in T cell  
14 activation, effector functions, and T follicular helper cells (Tfh), including  
15 *Cxcr5*, *Pdcd1*(PD-1) *Il21*, *Ifng*, *Tbx21* (T-bet), *Mki67* (Ki-67) (**Figure 2B**). On  
16 the other hand, genes in the upper left quadrant (i.e. negative in Axis 1 and  
17 positive in Axis 2) were enriched with Treg-associated genes including *Ctla4*,  
18 *Il2ra* (CD25), *Itgae* (CD103), *Tnfrsf9* (4-1BB) and *Tnfrsf4* (OX40) (**Figure 2B**).  
19 These results indicate that a set of activation genes are operating in all the  
20 three non-naïve T cell populations (i.e. Treg, Teff and Tmem), while some of  
21 them are more specific to Treg.

22

23

1 *The Treg transcriptome is characterized by the repression of a part of the*  
2 *activation genes in Tmem transcriptome*

3 Next, we determine the modules of genes that are differentially regulated  
4 between Treg and Tmem, in order to reveal the multidimensional identity of  
5 Treg and Tmem transcriptomes. Specifically, we asked if the Axis 2 captured  
6 the differential transcriptional regulations between Tmem and Treg.

7 Importantly, Axis 2 represents Foxp3-driven and Runx1-driven transcriptional  
8 effects, which are correlated with Treg and Tmem/Teff, respectively (**Figure**  
9 **3A**). This suggests that Axis 2 provides a ‘scoring system’ for regulatory vs  
10 effector functions. Thus, the genes in Axis 1-low (precisely, genes above 25  
11 percentile for positive correlations with Tact) were identified as *Tact genes*,  
12 which were subsequently classified into Axis 2-positive (i.e. positive  
13 correlations with Foxp3 and Treg) [designated as “*Tact-Foxp3 genes*”; top left  
14 quadrant of CCA gene space in Figure 1D] and Axis 2-negative genes (i.e.  
15 positive correlations with Runx1 and Tmem/Teff) [designated as “*Tact-Runx1*  
16 *genes*”; bottom left quadrant of CCA gene space in Figure 1D] (**Figure 3A**).

17 *Tact-Runx1 genes* contain genes linked to T cell activation (e.g. *Mki67*),  
18 effector functions (e.g. *Tbx21*), and Tfh (e.g. *Bcl6*, *Pdcd1*), while *Tact-Foxp3*  
19 genes contain “Treg markers” such as *Il2ra* (CD25) and *Tnfrsf18* (GITR)  
20 (**Figure 2B**). These encouraged us to further analyse the gene space of the  
21 CCA solution, aiming to capture the unique regulation of activation genes in  
22 Foxp3+ Treg in comparison to Foxp3- non-naive T cells which include Tmem  
23 and Teff.

1 Intriguingly, heatmap analysis showed that both Treg and Tmem expressed  
2 Tact-Foxp3 genes at high levels, compared to naïve and effector T cells  
3 (**Figure 3B**). On the other hand, Tact-Runx1 genes were selectively  
4 downregulated in Treg, while their expressions were sustained in Tmem  
5 (**Figure 3C**). In other words, the repression of Tact-Runx1 genes was the  
6 major feature of Treg in comparison to Tmem (**Figure 2A**). Interestingly,  
7 comparable selective downregulation of Tact-Runx1 genes was observed in  
8 Teff as well (**Figure 3C**). This suggests that the set of activation genes  
9 operating in Teff is different from the ones in Tmem, and that Tmem and Treg  
10 share more activation genes than Treg-Teff and Tmem-Teff (**Figure 3B and**  
11 **3C**). These collectively indicate that the Treg-ness is composed of the  
12 induction of the Treg-Tmem shared activation genes and the repression of  
13 Tmem-specific genes, defining the multidimensional identity of Treg.

14 While the overall activation levels of Treg and Tmem are similar to the ones of  
15 Teff at transcriptional level (Figure 1B), when explained by the prototype  
16 signature of activation in CD4+ T cells (i.e. the explanatory variable Tact), the  
17 compositions of the activation genes are different between Treg, Tmem and  
18 Teff (as captured by Figure 3B and 3C). Importantly, many of these activation  
19 genes are shared between Treg and Tmem, but not with Teff. The closer  
20 similarity between resting Treg and Tmem, compared to Teff, is not surprising,  
21 considering that both resting Treg and Tmem are considered to be at the  
22 resting steady-state, while Teff are more recently activated and executing  
23 effector functions, which presumably require unique sets of genes. These  
24 features were not captured by standard t-test analysis (**Supplementary Fig**  
25 **1**), presumably due to the lack of multidimensional perspective.



1 Tact-Foxp3 genes included the transcription factors *Nfat5*, *Runx2*, and *Ahr*,  
2 which were expressed by most of Tmem cells as well (**Figure 3D**). The Treg-  
3 associated markers, *Il2ra* (CD25), *Itgae* (CD103), and *Tnfrsf18* (GITR) were  
4 expressed not only by Treg but also by Tmem at moderate to high levels.  
5 Notably, the expression of *Ctla4*, *Ccr4*, and *Lag3* was high in Treg and Tmem  
6 cells, but it was repressed in Teff (**Figure 3D**). This suggests that Treg and  
7 Tmem are in later stages of T cell activation, when the expression of CTLA-4  
8 is induced as a negative feedback mechanism (41), while it is not induced in  
9 tissue-infiltrating Teff, presumably because they are more recently activated  
10 and actively proliferating.

11 Tact-Runx1 genes included many cell cycle-related genes (e.g. *Ccna1*,  
12 *Cdca2*, and *Chek2*), suggesting that these cells are in cell cycle and  
13 proliferating (**Figure 3E**). The higher expression of *Mki67* and *Fos* suggests  
14 that these Tmem cells had been activated by TCR signals *in vivo* before the  
15 analysis. Tact-Runx1 genes also included the transcription factors *Tbx21*,  
16 *Maf*, *Hif1a*, and *Bcl6*, which have roles in Th1, Th2, Th17, and Tfh  
17 differentiation, respectively (42-44). In accordance with this, the Tfh markers  
18 *Cxcr5* and *Pdcd1* were specifically expressed by Tmem. These results are  
19 compatible with the model that Treg and Tmem constitute the self-reactive T  
20 cell population that have constitutive activation status (7), and that the major  
21 function of Foxp3 is to modify the constitutive activation processes by  
22 repressing a part of the activation gene modules (i.e. Tact-Runx1 genes)  
23 (**Figure 4**).

24

1 *The activated status of Treg is TCR signal dependent*

2 We next asked whether the constitutively “activated” status of Treg is  
3 dependent on TCR signals. We applied CCA to the microarray data of  
4 CD44<sup>hi</sup>CD62L<sup>lo</sup> activated Treg (CD44<sup>hi</sup> activated Treg) and CD44<sup>lo</sup>CD62L<sup>hi</sup>  
5 naïve-like Treg (CD44<sup>lo</sup> naïve Treg) from inducible *TCRa* KO or WT (TCR KO  
6 data, **Table 1, Figure 5A**) using the T cell activation variable as explanatory  
7 variable. The CCA result showed that CD44<sup>hi</sup> activated Treg from WT mice  
8 only showed high activation scores, compared with all the other groups.  
9 Interestingly, *TCRa* KO CD44<sup>lo</sup> naïve-like Treg showed the lowest scores, and  
10 were lower than WT CD44<sup>lo</sup> naïve-like Treg (**Figure 5B**). These results  
11 indicate that TCR signaling is required for the constitutive activation status of  
12 Treg, especially CD44<sup>hi</sup> activated Treg, and suggest that these activated Treg  
13 are more enriched with the cells that received TCR signals recently,  
14 compared to CD44<sup>lo</sup> naïve-like Treg.

15 In order to further address whether the TCR signal-dependent activation  
16 signature of Treg is constitutively maintained or specifically induced by *in vivo*  
17 activation events (presumably as tonic TCR signals (7)), we analysed the  
18 RNA-seq dataset of *in vivo* activated Treg (Ref. (16), **Table 1**). The dataset  
19 was generated by depleting a part of Treg by Diphtheria toxin (DT) using bone  
20 marrow chimera of *Foxp3*<sup>GFPCreERT2</sup>:*Rosa26YFP* and *Foxp3*<sup>GFP DTR</sup> (16). The  
21 DT treatment depletes DT receptor (DTR)-expressing Treg from *Foxp3*<sup>GFP DTR</sup>,  
22 and thus induces a transient inflammation through the reduction of Treg. Van  
23 der Veecken *et al* thus analysed resting Treg from untreated mice (rTreg),  
24 activated Treg from mice with recent depletion (11 days before the analysis)

1 in an inflammatory condition (aTreg), and “memory” Treg (mTreg) from mice  
2 with a distant depletion (60 days before the analysis) (**Figure 5C**). As  
3 expected, the CCA analysis using the T cell activation variable showed that  
4 aTreg had higher activation scores than both rTreg and mTreg (**Figure 5D**).  
5 This indicates that the activation mechanisms are more actively operating in  
6 activated Treg in an inflammatory environment.

7 In order to further dissect the activation signature of Treg, we obtained the  
8 lists of differentially expressed genes (DEG) between WT Treg vs *TCRa* KO  
9 Treg (designated as *TCR-dependent genes*), and between aTreg and rTreg  
10 (designated as *aTreg-specific genes*, see Methods). Interestingly, 94/286  
11 genes of Tact-Runx1 genes (Tmem-specific activation genes, repressed in  
12 resting Treg) are also used during the activation of Treg (**Figure 6A**), while  
13 only 8/119 of Tact-Foxp3 genes (used by Tmem and resting Treg) are  
14 induced during the activation of Treg (**Figure 6B**). This indicates that the  
15 activation of Treg does not enhance the genes that are used in resting Treg,  
16 but induces the expression of the Tmem-specific genes that are suppressed  
17 in resting Treg. On the other hand, 51/286 of Tact-Runx1 and 19/119 of Tact-  
18 Foxp3 genes are regulated by TCR signalling by *TCRa* KO (**Figure 6A and**  
19 **6B**), suggesting that the activation status of resting Treg and Tmem may be  
20 sustained by TCR signals. Pathway analysis showed that Tact-Runx1 and  
21 aTreg-specific genes were enriched for cell-cycle related pathways. In  
22 contrast, Tact-Foxp3 genes were enriched for pathways related to signal  
23 transduction only (**Figure 6C**). Collectively, the results above suggest that  
24 resting Treg are maintained by TCR and cytokine signalling, and that the

1 activation of Treg induces the transcriptional activities of Tact-Runx1 genes,  
2 which promote proliferation and cell division.

3

4 *Tumour-infiltrating FOXP3+ Treg are more enriched in activated T cells than*  
5 *resting cells by single cell CCA*

6 The analyses above led us to hypothesise that the activation status of Treg is  
7 variable at the single cell level in physiological settings. In order to address  
8 this predicted heterogeneity in Treg, we investigated single cell data and  
9 further addressed how the activation mechanisms are operating in Treg at the  
10 single cell level. In order to address the differential regulations of activation  
11 mechanisms in individual Treg and related T cells, firstly, the features of  
12 individual cells needed to be characterized in a data-oriented manner, as no  
13 annotation data were available for individual single cells. CCA is a powerful  
14 method for identifying biological meanings, and we applied CCA to the single  
15 cell RNA-seq data of tumour-infiltrating T cells from human patients (Ref. (35)  
16 **Table 1**).

17 Firstly, we applied the standard CCA to the single cell RNA-seq data of  
18 CD4<sup>+</sup>CD3<sup>+</sup> T cells (single-cell T cell samples of Treg and CD4<sup>+</sup> non-Treg cells  
19 with unknown individual activation and differentiation statuses), using the  
20 explanatory variables of activated conventional CD4<sup>+</sup> T cells (Tact) and  
21 resting T cells (Trest; GSE15390, **Table 1**), aiming to define activated T cells  
22 and resting T cells by the correlations to these two variables (**Figure 7A**) in  
23 Axis 1. Here we used these two variables, Tact and Trest, instead of the log<sub>2</sub>  
24 fold changes between the two populations (i.e. T cell activation variable,

1 which produces a 1-dimensional CCA solution visualized as a single axis),  
2 because we aimed to identify an additional major differentiation process(es) in  
3 the Axis 2 (i.e. two explanatory variables produce a 2-dimensional result). In  
4 the single cell space of the CCA solution, the majority of FOXP3<sup>+</sup> T cells had  
5 negative gene scores in the Axis 1, i.e. showing high positive correlations to  
6 the T cell activation variable (**Figure 7B**). Here, CCA Axis 1 x (-1) is  
7 designated as the *Activation Score*. Thus, using the Axis 1 score and FOXP3  
8 expression, the following 4 subpopulations were defined: “Activated FOXP3<sup>+</sup>”,  
9 “Resting FOXP3<sup>+</sup>”, “Activated FOXP3<sup>-</sup>”, and “Resting FOXP3<sup>-</sup>” (**Figure 7B**).

10 Next, we aimed to determine whether activated Treg are more activated than  
11 resting Treg at the single cell level, or whether Treg are enriched with  
12 activated T cells. Establishing the T cell activation score by Axis 1 score (as  
13 the correlation to Tact in Figure 4B, see Methods), FOXP3<sup>+</sup> Treg had  
14 significantly higher scores than FOXP3<sup>-</sup> non-Treg on average, as indicated by  
15 the higher median in the violin plots and greater density of samples with  
16 higher CCA gene scores for T cell activation variable (**Figure 7C**). Using the  
17 CCA definition of Activated and Resting Treg and non-Treg in Figure 4B, the  
18 activation score neatly captured the activated status of single cells, allocating  
19 high positive and negative scores to Activated and Resting cells, respectively  
20 (**Figure 7D**). Importantly, there was no significant difference between  
21 Activated FOXP3<sup>+</sup> and Activated FOXP3<sup>-</sup> cells and between Resting FOXP3<sup>+</sup>  
22 and Resting FOXP3<sup>-</sup> cells (**Figure 7D**), indicating that in tumour  
23 microenvironment, Treg cells are as activated as non-Treg CD4<sup>+</sup> T cells,  
24 which may include T<sub>eff</sub>, T<sub>mem</sub>, and T<sub>fh</sub>. These results suggest that the Treg  
25 population have an activated signature because FOXP3<sup>+</sup> cells are enriched

1 with T cells that have recognised antigens and received TCR signals (i.e.  
2 activated T cells), and that TCR signals can induce FOXP3 in these antigen-  
3 experienced T cells. Alternatively, but not exclusively, FOXP3<sup>+</sup> T cells may  
4 have high-affinity TCRs to self-MHC and/or tumour antigens and be more  
5 prone to be activated. In fact, strikingly, 32.5% of activated T cells by the CCA  
6 result expressed FOXP3, while only 8.2% of resting T cells expressed  
7 FOXP3. In other words, FOXP3 expression occurred more frequently in  
8 activated T cells.

9 In the gene space of the CCA solution, genes with strong correlations to  
10 activated FOXP3<sup>+</sup> T cells included *FOXP3* itself and common Treg markers  
11 such as *CTLA4* and *IL2RA* (CD25), which were found in the upper left  
12 quadrant (Axis 1-negative Axis 2-positive). Interestingly, the lower left  
13 quadrant (Axis 1-negative Axis 2-negative) contained more Tfh-like or  
14 effector-like molecules *PDCD1* (PD-1), *BCL6*, *IL21*, and *IFNG*. The  
15 chemokine receptors *CCR5* and *CCR2* had negative scores in Axis 1 (i.e.  
16 correlated with Tact), while *CCR7* had a high positive score in Axis 1 (i.e.  
17 correlated with Trest) (**Figure 7E**).

18

19 *Identification of Tfh-like differentiation and Foxp3-driven processes and the*  
20 *common activation process in tumour-infiltrating T cells*

21 Next, we aimed to identify major differentiation and activation processes in the  
22 single cell transcriptomes above. To this end, we have employed a new CCA  
23 approach using Single cell analysis (Single Cell Combinatorial CCA, SC4A),  
24 which aims to construct a CCA model of single cell data and thereby to

1 identify major differentiation/activation processes and the underlying gene  
2 regulations (**Figure 8A**, see Methods and Supplementary Text). Firstly, we  
3 classified single cells into Activated and Resting cells, and FOXP3<sup>+</sup> Treg and  
4 FOXP3<sup>-</sup> non-Treg, and thereby identified the following 4 processes as  
5 putative differentiation and activation processes in the dataset: T cell  
6 activation (Activated cells), and naïve-ness (Resting cells), FOXP3-driven  
7 process (Activated FOXP3<sup>+</sup>), and Tfh-like process (Activated FOXP3<sup>-</sup>)  
8 (Figure 4). Secondly, based on their high scores in the CCA solution (i.e.  
9 either high positive or high negative scores in either Axis 1 or 2 in Figure 4E)  
10 and abundant expressions in major populations (Figure 4F-4L), we selected  
11 12 candidate genes (*CCR7*, *CCR5*, *CCR4*, *IL2RA*, *IL2RB*, *CTLA4*, *ICOS*,  
12 *TNFRSF4*, *TNFRSF9*, *FOXP3*, *BCL6*, *PDCD1*) as the candidate genes for the  
13 four processes. From these genes, we identified the most positively correlated  
14 gene to each of the 4 processes using the combinatorial CCA (i.e. test all the  
15 combinations of the variables by CCA and obtain the most correlated gene for  
16 each population; see Method). Thus, *PDCD1*, *FOXP3*, *CTLA4*, and *CCR7*  
17 were identified as the most correlated gene for Activated FOXP3<sup>-</sup>, Activated  
18 FOXP3<sup>+</sup>, Activated T cells, and Resting T cells, respectively (**Supplementary**  
19 **Figure 3**), which represent the four immunological processes (see above).  
20 Finally, using these 4 genes as explanatory variable, we applied CCA to the  
21 single cell transcriptomes, obtaining the solution of the SC4A approach.  
22 The single cell space of the SC4A solution showed that Activated and Resting  
23 T cells had negative and positive scores, respectively (**Figure 8B**). This  
24 indicates that Axis 1 represents the T cell activation vs naïve-ness. Single  
25 cells were successfully clustered into Activated FOXP3<sup>+</sup> Treg, Activated

1 FOXP3- non-Treg, and Resting T cells. Resting FOXP3+ Treg and Resting  
2 FOXP3- T cells were mostly overlapped (**Figure 8C**), indicating that the major  
3 features in the dataset dominated the difference between these two resting T  
4 cell groups. Importantly, the explanatory variable CTLA4, which represents  
5 the T cell activation process, was highly correlated with both Activated  
6 FOXP3<sup>+</sup> Treg and Activated FOXP3- non-Treg at the middle, indicating its  
7 neutral position in terms of Tfh and Treg activation processes. As expected,  
8 the variable CCR7, which represents naïve-ness, was correlated with both  
9 Resting FOXP3+ Treg and Resting FOXP3- T cells. The explanatory variable  
10 PDCD1, which represents the Tfh-like process, was highly correlated with  
11 Activated FOXP3- non-Treg cells, while the variable FOXP3 was correlated  
12 with Activated FOXP3+ Treg. Thus, the single cell transcriptomes were  
13 modelled by the correlations between gene expression, single cells, and the  
14 expression of the 4 key genes, which represent the 4 immunological  
15 processes (**Figure 8B and 8C**). Principal Component Analysis and t-  
16 distributed stochastic neighbor embedding (t-SNE) did not provide insights  
17 into such cross-level relationships or clear separations of the populations  
18 (**Supplementary Figure 4**).

19 Next, in order to understand the relationship between the T cell activation  
20 signature and FOXP3-driven and Tfh-like processes (**Figure 8C**), we aimed to  
21 identify and characterise genes with high correlations to these processes,  
22 which were represented by CTLA4, FOXP3, and PDCD1, by analysing the  
23 gene space of the final output of SC4A (see Methods). As expected, the Tfh  
24 genes, *IL21* and *BCL6* (45), were highly correlated with *PDCD1*. *IL2RA*  
25 (*CD25*) is a Treg marker (46) and was highly correlated with *FOXP3*. *IL7R*



1 and *BACH2* are known to be associated with naïve T cells (47, 48), and were  
2 positively correlated with CCR7, which represents the naïve-ness (**Figure**  
3 **8C**). Thus we identified *FOXP3-driven Treg genes* and *Tfh-like genes*  
4 according to their high correlation to the *FOXP3* and the *PDCD1* explanatory  
5 variables, respectively, while we designated as *Activation genes* the genes  
6 that have high correlations with the *CTLA4* variable, including *LAG3* and  
7 *CCR5*, and were positioned around 0 in Axis 2.

8

9 *Identification of the bifurcation point of activated T cells that leads to Tfh-like*  
10 *and Treg differentiation in tumour-infiltrating T cells*

11 The analyses above strongly suggested that there are two major  
12 differentiation pathways for those tumour-infiltrating T cells, which are  
13 regulated by FOXP3-driven and Tfh-like processes. In order to identify these  
14 lineages, we applied an unsupervised clustering algorithm to the sample  
15 space of the SC4A/CCA result (Figure 8C), and identified 6 clusters, to which  
16 a pseudotime method (49) was applied, “lineage” curves were constructed  
17 (**Figure 8D**; see **Methods**). Importantly, the lineage curves had a bifurcation  
18 point at the Cluster 2, which leads to the two distinct differentiation pathways,  
19 Tfh-like and FOXP3-driven differentiation. Since cells may change and mature  
20 their phenotypes in different dynamics between these two lineages, we  
21 designated Tfh-like-associated and FOXP3-associated pseudotime as Tfh-  
22 pseudotime and FOXP3-pseudotime (**Figure 8D**).

23 In fact, the expression of Activation genes was progressively increased in the  
24 common clusters for the two pseudotime (i.e. the Clusters 1 and 2) and

1 throughout the rest of the FOXP3-pseudotime and the early phase of Tfh-like  
2 differentiation in Tfh-pseudotime (i.e. Cluster 3), while it was suppressed  
3 towards the end of Tfh-pseudotime (Cluster 4; **Figure 8E**). Given that Tfh-  
4 pseudotime is correlated with PDCD1 expression (**Figure 8C**), this suggests  
5 that *PDCD1* expression and the Tfh-effector process is induced during earlier  
6 phases, and that the activation processes in *PDCD1*<sup>high</sup> T cells with are  
7 suppressed, presumably through PD1-PDL1 interactions in the tumour  
8 environment (50). Interestingly, FOXP3-driven genes had similar dynamics to  
9 Activation genes in both FOXP3- and Tfh-pseudotime (**Figure 8F**). In  
10 contrast, Tfh-like genes were mostly suppressed throughout FOXP3-  
11 pseudotime, while they were progressively induced throughout Tfh-  
12 pseudotime (**Figure 8G**). These differential regulations of two gene modules  
13 resonate with those of Tact-Foxp3 (which are expressed by both Treg and  
14 Tmem) and Tact-Runx1 genes (which are expressed specifically by Tmem  
15 only) (Figure 3). In fact, FOXP3 expression is weakly induced in some cells in  
16 the bifurcating Cluster 2, and is progressively increased at and beyond the  
17 Cluster 5 (**Figure 8H**). In contrast, RUNX1 is highly expressed in the common  
18 Clusters 1 and 2, while it is specifically suppressed in the early phase of  
19 FOXP3-pseudotime (Cluster 5, **Figure 8I**). By analysing other key genes used  
20 as CCA explanatory variables, both CTLA4 and PDCD1 were induced at the  
21 bifurcating point, Cluster 2, and onwards in both of the lineages, while PDCD1  
22 expression was specifically suppressed throughout FOXP3-pseudotime  
23 (**Figure 8J and 8K**). CCR7 is highly expressed in the relatively naïve cells,  
24 Cluster 1, and moderately downregulated at the bifurcation point, Cluster 2,

1 and suppressed beyond that in both FOXP3- and Tfh-pseudotime (**Figure**  
2 **8L**).

3 These results collectively support the model that constant activation  
4 processes in the tumour microenvironment promote terminal differentiation of  
5 the Treg- and Tfh-like lineages in both previously committed and non-  
6 committed lineages of T cells. Interestingly, the Cluster 2 is the bifurcation  
7 point, in which T cells show moderate activation and are engaged in decision-  
8 making about their cell fate. This understanding was possible because SC4A  
9 effectively annotated genes and cells and thereby allowed to identify new cell  
10 populations.

11

12 *Identification of markers for the differential regulation of Tfh-like and Treg*  
13 *differentiation in activated T cells*

14 Lastly, we aimed to identify new combinations of marker genes in order to  
15 demonstrate the strength of the current approaches. The SC4A identified the  
16 two lineages of T cells, and their potential differentiation dynamics, FOXP3-  
17 and Tfh-pseudotime: the FOXP3-driven pathway differentiates Treg via the  
18 clusters 1-2-5-6, while the Tfh-like pathway differentiates Teff via the clusters  
19 1-2-3-4 (Figure 9A). Since Activation genes (Figure 8C) are shared by early  
20 phases of Tfh-like and FOXP3-driven differentiation (Figure 8E), we took the  
21 intersect of these genes and the Tact-Foxp3 genes, which were expressed by  
22 both resting Tmem and resting Treg in the immgen dataset (Figure 3). Thus,  
23 we obtained *DUSP4* and *NFAT5*, which were in fact induced in cells at the  
24 activated bifurcating Cluster 2 and onwards (**Figure 9B**). Similarly, in order to

1 identify Treg-specific genes, we took the intersect of FOXP3-driven genes  
2 (Figure 8C) and the Tact-Foxp3 gene, and thereby obtained *CCR8* and  
3 *IL2RA*. These genes were induced highly and progressively in Treg-lineage  
4 cells throughout FOXP3-pseudotime, while suppressed across Tfh-  
5 pseudotime (**Figure 9C**). Next, in order to identify activated non-Treg (Tfh-  
6 like)-specific genes, we took the intersect of Tfh-like genes (Figure 8C) and  
7 the Tact-Runx1 genes, which are expressed in resting Tmem but suppressed  
8 in resting Treg (Figure 2). These genes contained *BCL6* and *KCNK5*, which  
9 were progressively induced across Tfh-pseudotime, while suppressed in  
10 FOXP3-pseudotime (**Figure 9D**).

11 Lastly, in order to make the newly obtained knowledge easily accessible to  
12 experimental biologists, we showed the expression of *NFAT5*, *IL2RA*, *CCR8*,  
13 *BCL6*, and *KCKN5* in the tumour-infiltrating T cells (**Figure 9E**). The common  
14 activation gene *NFAT5*<sup>+</sup> in fact captured 43% of Treg-lineage cells (i.e. cells  
15 in the Clusters 5 and 6) and 52% of Tfh-like-lineage cells (i.e. cells in the  
16 Clusters 3 and 4). The Treg-specific genes *IL2RA* and *CCR8* were expressed  
17 by the majority of T cells, whether NFAT-positive or negative. In contrast, the  
18 Tfh-like-specific genes *BCL6* and *KCKN5* were expressed by a majority of  
19 Tfh-like-lineage cells and were not expressed in Treg-lineage cells (**Figure**  
20 **9E**). Collectively, these results indicate that the SC4A analysis successfully  
21 decomposed the gene regulations for T cell activation and Treg and effector T  
22 cell differentiation, identifying new cell populations, which include activated  
23 cells at the bifurcation point, early and late phases of Treg and Tfh-like  
24 differentiation, and their feature genes. In addition, although there must be  
25 considerable differences between resting T cells in the secondary lymphoid

1 organs and between human and mice, our study successfully identified the  
2 shared activation processes and the conserved genes that are differentially  
3 used between the Treg- and the Teff-lineage cells.

4

## 1 Discussion

2 Resting Treg showed an activated status, comparable to that of Teff and  
3 Tmem at the population level. In addition, the activation signature of Treg was  
4 more remarkable in CD44<sup>hi</sup>CD62L<sup>lo</sup> activated Treg than CD44<sup>lo</sup>CD62L<sup>hi</sup> naïve-  
5 like Treg. CD44<sup>hi</sup>CD62L<sup>lo</sup> Treg are also identified as eTreg, which may have  
6 enhanced immunosuppressive activities (51). The eTreg fraction includes the  
7 GITR<sup>hi</sup>PD-1<sup>hi</sup>CD25<sup>hi</sup> “Triple-high” eTreg that express high CD5 and Nur77  
8 expressions, which indicate that they have received strong TCR signals (17).  
9 In humans, CD25<sup>hi</sup>CD45RA<sup>-</sup>FOXP3<sup>hi</sup> eTreg highly express Ki67 (52),  
10 indicating that these cells were recently activated. Given that TCRs of Treg  
11 have higher affinities to self-antigens (53), these eTreg may have the most  
12 self-reactive TCRs during homeostasis. Alternatively, the eTreg subset may  
13 have immediately recently received strong TCR signals and upregulated  
14 activation markers, and such cells may acquire a resting status at later time  
15 points. Future investigations by TCR repertoire analysis will answer this  
16 question.

17 Our study revealed the heterogeneity of FOXP3<sup>+</sup> Treg at the single cell level,  
18 and showed that tumour-infiltrating Treg include FOXP3<sup>+</sup> T cells with various  
19 levels of activation (Figure 4B and Figure 6B). It is plausible that, in the  
20 physiological polyclonal settings, the variations in the activated status of  
21 individual Treg may be due to the TCR affinity to its cognate antigen, the  
22 availability of cognate antigen, and the strength and duration of TCR signals.  
23 Our SC4A analysis identified the FOXP3-driven genes, which are specific to  
24 activated FOXP3<sup>+</sup> cells and include the IL-2 and common gamma chain

1 cytokine receptors (i.e. *IL2RA*, *IL2RB*, *IL15RA*, *IL4R*, and *IL2RG*), DNA  
2 replication licensing factor (e.g. MCM2), and transcription factors such as  
3 *PRDM1* (BLIMP1) and *IRF4* (which control the differentiation and function of  
4 eTreg (19)). These gene modules are distinct from the Tfh-like genes and the  
5 activation genes (Figure 8), and may be controlled specifically by FOXP3  
6 under strong TCR signals. /These genes expressions/ The expression of  
7 these genes is variable /are various/ within the FOXP3+ T cells, suggesting  
8 that the transcriptional activities of these genes are dynamically regulated  
9 over time in tumour-infiltrating Treg. Thus, single cell-level analysis is  
10 becoming a key technology to address the heterogeneity of Treg. To our  
11 knowledge, this study is one of the first single cell analyses of Treg  
12 transcriptomes, while we find that, during the review process of this  
13 manuscript, another study addressing Treg heterogeneity by single cell RNA-  
14 seq was deposited at a preprint server (54)).

15 The shared activation genes between activated FOXP3+ Treg and FOXP3-  
16 non-Treg contain apoptosis-related genes (e.g. *CASP3*, *BAD*), which may be  
17 differentially controlled between Treg and non-Treg at the protein level. For  
18 example, activated FOXP3- non-Treg express *DUSP6* (Figure 8E), which is a  
19 negative regulator of JNK-induced apoptosis through BIM activation, while  
20 FOXP3 suppresses *DUSP6* expression and promote the apoptosis  
21 mechanism (55). In addition, the activation genes include transcription factors  
22 such as *TBX21* (T-bet) and *BATF*. Although *TBX21* is sometimes thought to  
23 be a Th1-specific gene, it is upregulated immediately after T cell activation  
24 (56). *BATF* was identified as a critical factor for the differentiation and  
25 accumulation of tissue-infiltrating Treg (57). These activation genes may be

1 required when T cells are activated and differentiate into either Treg or Teff.

2 Further studies are required to investigate the temporal sequences of these

3 differentiation events *in vivo*.

4 Although the effects of TCR signals on Tmem were not directly examined,

5 considering that Tmem are self-reactive and their differentiation is dependent

6 on the recognition of cognate antigens in the thymus (7), these results

7 collectively suggest that the activation signature of Tmem is also dependent

8 on TCR signals, as is the signature of Treg (Figure 2F). Intriguingly, some

9 Treg may lose their Foxp3 expression and become ex-Treg, which are

10 enriched in CD44<sup>hi</sup> effector T cells or Tmem (30). In contrast, a Tmem

11 population (precisely, Foxp3<sup>-</sup>CD44<sup>hi</sup>CD73<sup>hi</sup>FR4<sup>hi</sup> T cells) efficiently express

12 Foxp3 during lymphopenia (58). These findings support the feedback control

13 model that Foxp3 expression can be induced in Tmem and sustained in Treg

14 as a regulatory feedback mechanism for TCR signals (7). Given the variations

15 in the activated status in individual Treg and Tmem, single cell analysis will be

16 required to address this problem. For example, although Samstein *et al.*

17 showed that DNA hypersensitivity sites in Treg are similar to those in

18 activated T cells (9), it is possible that DNA hypersensitivity sites are variable

19 between individual Treg, and that Tmem may have a similar chromatin

20 structure to Treg.

21 Importantly, our analysis showed that Tmem-specific activation-induced

22 genes (i.e. Tact-Runx1 genes) are uniquely repressed in Treg. The repression

23 is likely to be mediated by the interaction between Foxp3 and other

24 transcription factors that regulate the expression of the Tmem-specific



1 activation genes (Figure 2F). Interestingly, Runx1 was associated with these  
2 Tmem-specific genes. In fact, Foxp3 interacts with Runx1 and thereby  
3 represses IL-2 transcription and controls the regulatory function of Treg (38),  
4 and a significant part of the Foxp3-binding to active enhancers occurs through  
5 the Foxp3-Runx1 interaction (9). These suggest that Runx1 may have a  
6 unique role in the differentiation and maintenance of Tmem.

7 While CTLA-4 is commonly recognised as a Treg marker, it is upregulated in  
8 all activated T cells, thus CTLA-4 is also a marker of activated T cells (41).  
9 CTLA-4 is in fact expressed by only a subset of resting Treg (59), which may  
10 be more activated and proliferating *in vivo* (60). In fact, our study shows that  
11 CTLA-4 is expressed by non-Treg activated T cells including resting Tmem  
12 (Figure 2D) and FOXP3- Tfh-like effector T cells in the tumour  
13 microenvironment (Figure 4G and 6C). Our SC4A analysis also identified  
14 CTLA-4 as a molecule representing the activation process of CD4+ T cells.  
15 These findings support that CTLA-4 is primarily a marker for general T cell  
16 activation, rather than Treg-specific marker, and that Treg are highly activated  
17 T cells with Foxp3 and CTLA-4 expression. In order to address this problem,  
18 the *in vivo* dynamics of CTLA-4 expression need to be investigated. We  
19 anticipate that single cell analysis will reveal the dynamics of CTLA-4  
20 expression and T cell activation levels in resting Treg and other activated T  
21 cells *in vivo*.

22 In contrast, PD-1 (*PDCD1*) was specifically expressed by activated FOXP3-  
23 non-Treg cells in the tumour microenvironment. The co-expression of *BCL6*  
24 and *IL21* in some of these PD-1+ cells indicates that Tfh differentiation occurs

1 in the tumour microenvironment, presumably through the repeated and  
2 chronic exposure to quasi-self antigens (i.e. tumour antigens). Interestingly,  
3 the Tfh signature has been identified in type-I diabetes including mice and  
4 humans (61). Intriguingly, the Tfh-like genes include cell-cycle related genes  
5 (e.g. *CDK6*), immediate early transcription factors (*NFATC1*, *EGR2/3*), and  
6 RNA-processing genes (e.g. *DICER1*). The significance of these gene  
7 modules should be addressed in the future studies. It should be emphasised,  
8 however, that PD-1 in the tumour microenvironment may constitute  
9 immunoregulatory mechanisms as well, which prevent effective tumour  
10 immunity (50). Further experimental investigations are required to address  
11 this problem.

12 SC4A is a useful method to identify distinct clusters of T cells and the  
13 correlated genes to each cluster, and thereby to reveal characteristic cell  
14 groups and their active gene modules, while retaining the single-cell level  
15 variations. We also showed that SC4A and CCA results can be further  
16 analysed by the pseudotime approach. Since SC4A/CCA provides functional  
17 annotations to cell groups and gene clusters, the understanding of the  
18 pseudotime axis is effective, as shown in the current study. However, it is  
19 emphasised that pseudotime is not a measurement of the time-dependent  
20 events, but rather is that of similarities between samples (62), and the  
21 conclusions in this study require future studies with a new experimental  
22 system to analyse time-dependent events in vivo. In order to make the current  
23 SC4A/CCA approach accessible, we visualised single cell data using a flow-  
24 cytometry style (Figure 9). Although currently reliable antibodies are not  
25 available for those intracellular candidate genes, and the expression of protein

1 and transcripts may not be synchronized, the current study showed that the  
2 power of single cell RNA-seq and the current SC4A/CCA approach. The  
3 current limitation of SC4A is that it is computationally expensive (i.e. requires  
4 several hours for each analysis using a standard desktop), and the  
5 improvement of the computational algorithm using a low-level language will be  
6 beneficial. Importantly, SC4A is most effective when used together with in-  
7 depth knowledge of immunology and gene regulation, which will facilitate the  
8 interpretation of CCA results and explanatory variable selection. Thus, it is  
9 hoped that these tools will be used widely by experimental immunologists with  
10 good understandings of the biological significance of results, as well as  
11 adequate competence in computational analysis, which will enable to ask  
12 questions involving multidimensional problems such as multiple T cell  
13 subsets.

14

#### 15 **Data and code availability**

16 All R codes are available upon request. Processed data will be provided upon  
17 reasonable requests to the corresponding author.

18

#### 19 **Acknowledgement**

20 We thank Dr David Bending for valuable comments on the manuscript. M.O.  
21 is a David Phillips Fellow (BB/J013951/2) from the Biotechnology and  
22 Biological Sciences Research Council (BBSRC), and is also supported by a  
23 pump-priming grant from Cancer Research Centre of Excellence, Imperial

- 1 College London/the Institute of Cancer Research. A.B is supported by the
- 2 Japanese Ministry of Education, Culture, Sports, Science and Technology
- 3 (MEXT) PhD scholarship.

## 1 References

- 2 1. Macian, F., C. Lopez-Rodriguez, and A. Rao. 2001. Partners in  
3 transcription: NFAT and AP-1. *Oncogene* 20: 2476-2489.
- 4 2. Malek, T. R. 2008. The biology of interleukin-2. *Annu Rev Immunol* 26:  
5 453-479.
- 6 3. Setoguchi, R., S. Hori, T. Takahashi, and S. Sakaguchi. 2005.  
7 Homeostatic maintenance of natural Foxp3(+) CD25(+) CD4(+)  
8 regulatory T cells by interleukin (IL)-2 and induction of autoimmune  
9 disease by IL-2 neutralization. *The Journal of experimental medicine*  
10 201: 723-735.
- 11 4. Hori, S. 2014. Lineage stability and phenotypic plasticity of Foxp3(+)  
12 regulatory T cells. *Immunological reviews* 259: 159-172.
- 13 5. Tran, D. Q., H. Ramsey, and E. M. Shevach. 2007. Induction of FOXP3  
14 expression in naive human CD4+FOXP3 T cells by T-cell receptor  
15 stimulation is transforming growth factor-beta dependent but does not  
16 confer a regulatory phenotype. *Blood* 110: 2983-2990.
- 17 6. Chen, W., W. Jin, N. Hardegen, K.-j. Lei, L. Li, N. Marinos, G.  
18 McGrady, and S. M. Wahl. 2003. Conversion of Peripheral  
19 CD4<sup>+</sup>CD25<sup>-</sup> Naive T Cells to  
20 CD4<sup>+</sup>CD25<sup>+</sup> Regulatory T Cells by TGF- $\beta$   
21 Induction of Transcription Factor *Foxp3*. *The Journal of*  
22 *experimental medicine* 198: 1875-1886.
- 23 7. Ono, M., and R. J. Tanaka. 2016. Controversies concerning thymus-  
24 derived regulatory T cells: fundamental issues and a new perspective.  
25 *Immunology and cell biology* 94: 3-10.
- 26 8. Thornton, A. M., and E. M. Shevach. 2000. Suppressor Effector  
27 Function of CD4<sup>+</sup>CD25<sup>+</sup> Immunoregulatory  
28 T Cells Is Antigen Nonspecific. *The Journal of Immunology* 164: 183-  
29 190.
- 30 9. Samstein, R. M., A. Arvey, S. Z. Josefowicz, X. Peng, A. Reynolds, R.  
31 Sandstrom, S. Neph, P. Sabo, J. M. Kim, W. Liao, M. O. Li, C. Leslie,  
32 J. A. Stamatoyannopoulos, and A. Y. Rudensky. 2012. Foxp3 exploits  
33 a pre-existent enhancer landscape for regulatory T cell lineage  
34 specification. *Cell* 151: 153-166.
- 35 10. Levine, A. G., A. Arvey, W. Jin, and A. Y. Rudensky. 2014. Continuous  
36 requirement for the TCR in regulatory T cell function. *Nature*  
37 *immunology* 15: 1070-1078.
- 38 11. Vahl, J. C., C. Drees, K. Heger, S. Heink, Julius C. Fischer, J. Nedjic,  
39 N. Ohkura, H. Morikawa, H. Poeck, S. Schallenberg, D. Rieß, Marco Y.  
40 Hein, T. Buch, B. Polic, A. Schönle, R. Zeiser, A. Schmitt-Gräff, K.

- 1 Kretschmer, L. Klein, T. Korn, S. Sakaguchi, and M. Schmidt-Supprian.  
2 2014. Continuous T Cell Receptor Signals Maintain a Functional  
3 Regulatory T Cell Pool. *Immunity* 41: 722-736.
- 4 12. Feuerer, M., J. A. Hill, K. Kretschmer, H. von Boehmer, D. Mathis, and  
5 C. Benoist. 2010. Genomic definition of multiple ex vivo regulatory T  
6 cell subphenotypes. *Proceedings of the National Academy of Sciences*  
7 *of the United States of America* 107: 5919-5924.
- 8 13. Koch, M. A., G. Tucker-Heard, N. R. Perdue, J. R. Killebrew, K. B.  
9 Urdahl, and D. J. Campbell. 2009. The transcription factor T-bet  
10 controls regulatory T cell homeostasis and function during type 1  
11 inflammation. *Nature immunology* 10: 595-602.
- 12 14. Zheng, Y., A. Chaudhry, A. Kas, P. deRoos, J. M. Kim, T. T. Chu, L.  
13 Corcoran, P. Treuting, U. Klein, and A. Y. Rudensky. 2009. Regulatory  
14 T-cell suppressor program co-opts transcription factor IRF4 to control  
15 T(H)2 responses. *Nature* 458: 351-356.
- 16 15. Linterman, M. A., W. Pierson, S. K. Lee, A. Kallies, S. Kawamoto, T. F.  
17 Rayner, M. Srivastava, D. P. Divekar, L. Beaton, J. J. Hogan, S.  
18 Fagarasan, A. Liston, K. G. Smith, and C. G. Vinuesa. 2011. Foxp3+  
19 follicular regulatory T cells control the germinal center response.  
20 *Nature medicine* 17: 975-982.
- 21 16. van der Veecken, J., A. J. Gonzalez, H. Cho, A. Arvey, S. Hemmers, C.  
22 S. Leslie, and A. Y. Rudensky. 2016. Memory of Inflammation in  
23 Regulatory T Cells. *Cell* 166: 977-990.
- 24 17. Wyss, L., B. D. Stadinski, C. G. King, S. Schallenberg, N. I. McCarthy,  
25 J. Y. Lee, K. Kretschmer, L. M. Terracciano, G. Anderson, C. D. Surh,  
26 E. S. Huseby, and E. Palmer. 2016. Affinity for self antigen selects  
27 Treg cells with distinct functional properties. *Nature immunology* 17:  
28 1093-1101.
- 29 18. Dias, S., A. D'Amico, E. Cretney, Y. Liao, J. Tellier, C. Bruggeman, F.  
30 F. Almeida, J. Leahy, G. T. Belz, G. K. Smyth, W. Shi, and S. L. Nutt.  
31 2017. Effector Regulatory T Cell Differentiation and Immune  
32 Homeostasis Depend on the Transcription Factor Myb. *Immunity* 46:  
33 78-91.
- 34 19. Cretney, E., A. Xin, W. Shi, M. Minnich, F. Masson, M. Miasari, G. T.  
35 Belz, G. K. Smyth, M. Busslinger, S. L. Nutt, and A. Kallies. 2011. The  
36 transcription factors Blimp-1 and IRF4 jointly control the differentiation  
37 and function of effector regulatory T cells. *Nature immunology* 12: 304-  
38 311.
- 39 20. Sakaguchi, S., M. Miyara, C. M. Costantino, and D. A. Hafler. 2010.  
40 FOXP3+ regulatory T cells in the human immune system. *Nature*  
41 *reviews. Immunology* 10: 490-500.

- 1 21. Fujii, H., J. Josse, M. Tanioka, Y. Miyachi, F. Husson, and M. Ono.  
2 2016. Regulatory T Cells in Melanoma Revisited by a Computational  
3 Clustering of FOXP3+ T Cell Subpopulations. *Journal of immunology*.
- 4 22. Andersen, P., and B. Smedegaard. 2000. CD4+ T-Cell Subsets That  
5 Mediate Immunological Memory to Mycobacterium tuberculosis  
6 Infection in Mice. *Infection and Immunity* 68: 621-629.
- 7 23. Coleman, M. M., C. M. Finlay, B. Moran, J. Keane, P. J. Dunne, and K.  
8 H. G. Mills. 2012. The immunoregulatory role of CD4+FoxP3+CD25-  
9 regulatory T cells in lungs of mice infected with Bordetella pertussis.  
10 *FEMS Immunology & Medical Microbiology* 64: 413-424.
- 11 24. Ono, M., J. Shimizu, Y. Miyachi, and S. Sakaguchi. 2006. Control of  
12 autoimmune myocarditis and multiorgan inflammation by  
13 glucocorticoid-induced TNF receptor family-related protein(high),  
14 Foxp3-expressing CD25+ and CD25- regulatory T cells. *Journal of*  
15 *immunology* 176: 4748-4756.
- 16 25. Linsley, P. S., J. L. Greene, P. Tan, J. Bradshaw, J. A. Ledbetter, C.  
17 Anasetti, and N. K. Damle. 1992. Coexpression and functional  
18 cooperation of CTLA-4 and CD28 on activated T lymphocytes. *The*  
19 *Journal of experimental medicine* 176: 1595-1604.
- 20 26. Attridge, K., and L. S. Walker. 2014. Homeostasis and function of  
21 regulatory T cells (Tregs) in vivo: lessons from TCR-transgenic Tregs.  
22 *Immunological reviews* 259: 23-39.
- 23 27. Bunce, C., and E. B. Bell. 1997. CD45RC Isoforms Define Two Types  
24 of CD4 Memory T Cells, One of which Depends on Persisting Antigen.  
25 *The Journal of experimental medicine* 185: 767-776.
- 26 28. Min, B., R. McHugh, G. D. Sempowski, C. Mackall, G. Foucras, and W.  
27 E. Paul. 2003. Neonates Support Lymphopenia-Induced Proliferation.  
28 *Immunity* 18: 131-140.
- 29 29. Curotto de Lafaille, M. A., A. C. Lino, N. Kutchukhidze, and J. J.  
30 Lafaille. 2004. CD25- T cells generate CD25+Foxp3+ regulatory T cells  
31 by peripheral expansion. *Journal of immunology* 173: 7259-7268.
- 32 30. Miyao, T., S. Floess, R. Setoguchi, H. Luche, H. J. Fehling, H.  
33 Waldmann, J. Huehn, and S. Hori. 2012. Plasticity of Foxp3(+) T cells  
34 reflects promiscuous Foxp3 expression in conventional T cells but not  
35 reprogramming of regulatory T cells. *Immunity* 36: 262-275.
- 36 31. Ono, M., R. J. Tanaka, M. Kano, and T. Sugiman. 2013. Visualising the  
37 Cross-Level Relationships between Pathological and Physiological  
38 Processes and Gene Expression: Analyses of Haematological  
39 Diseases. *PLoS One* 8: e53544.
- 40 32. Greenacre, M. 2008. *Correspondence Analysis in Practice*. Chapman  
41 & Hall/CRC,, London.

- 1 33. Tzeng, J., H. H.-S. Lu, and W.-H. Li. 2008. Multidimensional scaling for  
2 large genomic data sets. *BMC Bioinformatics* 9: 179.
- 3 34. Ono, M., R. J. Tanaka, and M. Kano. 2014. Visualisation of the T cell  
4 differentiation programme by Canonical Correspondence Analysis of  
5 transcriptomes. *BMC genomics* 15: 1028.
- 6 35. Tirosh, I., B. Izar, S. M. Prakadan, M. H. Wadsworth, 2nd, D. Treacy, J.  
7 J. Trombetta, A. Rotem, C. Rodman, C. Lian, G. Murphy, M. Fallahi-  
8 Sichani, K. Dutton-Regester, J. R. Lin, O. Cohen, P. Shah, D. Lu, A. S.  
9 Genshaft, T. K. Hughes, C. G. Ziegler, S. W. Kazer, A. Gaillard, K. E.  
10 Kolb, A. C. Villani, C. M. Johannessen, A. Y. Andreev, E. M. Van Allen,  
11 M. Bertagnolli, P. K. Sorger, R. J. Sullivan, K. T. Flaherty, D. T.  
12 Frederick, J. Jane-Valbuena, C. H. Yoon, O. Rozenblatt-Rosen, A. K.  
13 Shalek, A. Regev, and L. A. Garraway. 2016. Dissecting the  
14 multicellular ecosystem of metastatic melanoma by single-cell RNA-  
15 seq. *Science* 352: 189-196.
- 16 36. Wakamatsu, E., D. Mathis, and C. Benoist. 2013. Convergent and  
17 divergent effects of costimulatory molecules in conventional and  
18 regulatory CD4+ T cells. *Proceedings of the National Academy of  
19 Sciences of the United States of America* 110: 1023-1028.
- 20 37. Painter, M. W., S. Davis, R. R. Hardy, D. Mathis, C. Benoist, and C.  
21 Immunological Genome Project. 2011. Transcriptomes of the B and T  
22 lineages compared by multiplatform microarray profiling. *Journal of  
23 immunology* 186: 3047-3057.
- 24 38. Ono, M., H. Yaguchi, N. Ohkura, I. Kitabayashi, Y. Nagamura, T.  
25 Nomura, Y. Miyachi, T. Tsukada, and S. Sakaguchi. 2007. Foxp3  
26 controls regulatory T-cell function by interacting with AML1/Runx1.  
27 *Nature* 446: 685-689.
- 28 39. Chen, W., and R. Maitra. 2017. EMCluster: EM Algorithm for Model-  
29 Based Clustering of Finite Mixture Gaussian Distribution. R Package.
- 30 40. Street, K., D. Risso, R. B. Fletcher, D. Das, J. Ngai, N. Yosef, E.  
31 Purdom, and S. Dudoit. 2017. Slingshot: Cell lineage and pseudotime  
32 inference for single-cell transcriptomics. *bioRxiv*.
- 33 41. Walker, L. S., and D. M. Sansom. 2015. Confusing signals: recent  
34 progress in CTLA-4 biology. *Trends Immunol* 36: 63-70.
- 35 42. Szabo, S. J., B. M. Sullivan, C. Stemmann, A. R. Satoskar, B. P.  
36 Sleckman, and L. H. Glimcher. 2002. Distinct Effects of T-bet in  
37 T<sub>H</sub>1 Lineage Commitment and IFN- $\gamma$  Production in CD4  
38 and CD8 T Cells. *Science* 295: 338-342.
- 39 43. Dang, E. V., J. Barbi, H. Y. Yang, D. Jinasena, H. Yu, Y. Zheng, Z.  
40 Bordman, J. Fu, Y. Kim, H. R. Yen, W. Luo, K. Zeller, L. Shimoda, S. L.  
41 Topalian, G. L. Semenza, C. V. Dang, D. M. Pardoll, and F. Pan. 2011.



- 1 Control of T(H)17/T(reg) balance by hypoxia-inducible factor 1. *Cell*  
2 146: 772-784.
- 3 44. Ho, I. C., M. R. Hodge, J. W. Rooney, and L. H. Glimcher. 1996. The  
4 proto-oncogene c-maf is responsible for tissue-specific expression of  
5 interleukin-4. *Cell* 85: 973-983.
- 6 45. Vinuesa, C. G., M. A. Linterman, C. C. Goodnow, and K. L. Randall.  
7 2010. T cells and follicular dendritic cells in germinal center B-cell  
8 formation and selection. *Immunological reviews* 237: 72-89.
- 9 46. Sakaguchi, S., T. Yamaguchi, T. Nomura, and M. Ono. 2008.  
10 Regulatory T cells and immune tolerance. *Cell* 133: 775-787.
- 11 47. Seddon, B., and R. Zamoyska. 2002. TCR and IL-7 Receptor Signals  
12 Can Operate Independently or Synergize to Promote Lymphopenia-  
13 Induced Expansion of Naive T Cells. *The Journal of Immunology* 169:  
14 3752-3759.
- 15 48. Roychoudhuri, R., K. Hirahara, K. Mousavi, D. Clever, C. A. Klebanoff,  
16 M. Bonelli, G. Sciume, H. Zare, G. Vahedi, B. Dema, Z. Yu, H. Liu, H.  
17 Takahashi, M. Rao, P. Muranski, J. G. Crompton, G. Punkosdy, D.  
18 Bedognetti, E. Wang, V. Hoffmann, J. Rivera, F. M. Marincola, A.  
19 Nakamura, V. Sartorelli, Y. Kanno, L. Gattinoni, A. Muto, K. Igarashi, J.  
20 J. O'Shea, and N. P. Restifo. 2013. BACH2 represses effector  
21 programs to stabilize T(reg)-mediated immune homeostasis. *Nature*  
22 498: 506-510.
- 23 49. Lonnerberg, T., V. Svensson, K. R. James, D. Fernandez-Ruiz, I. Sebina,  
24 R. Montandon, M. S. Soon, L. G. Fogg, A. S. Nair, U. Liligeto, M. J.  
25 Stubbington, L. H. Ly, F. O. Bagger, M. Zwiessele, N. D. Lawrence, F.  
26 Souza-Fonseca-Guimaraes, P. T. Bunn, C. R. Engwerda, W. R. Heath,  
27 O. Billker, O. Stegle, A. Haque, and S. A. Teichmann. 2017. Single-cell  
28 RNA-seq and computational analysis using temporal mixture modelling  
29 resolves Th1/Tfh fate bifurcation in malaria. *Sci Immunol* 2.
- 30 50. Okazaki, T., S. Chikuma, Y. Iwai, S. Fagarasan, and T. Honjo. 2013. A  
31 rheostat for immune responses: the unique properties of PD-1 and their  
32 advantages for clinical application. *Nature immunology* 14: 1212-1218.
- 33 51. Rosenblum, M. D., S. S. Way, and A. K. Abbas. 2016. Regulatory T  
34 cell memory. *Nature reviews. Immunology* 16: 90-101.
- 35 52. Miyara, M., Y. Yoshioka, A. Kitoh, T. Shima, K. Wing, A. Niwa, C.  
36 Parizot, C. Taflin, T. Heike, D. Valeyre, A. Mathian, T. Nakahata, T.  
37 Yamaguchi, T. Nomura, M. Ono, Z. Amoura, G. Gorochoy, and S.  
38 Sakaguchi. 2009. Functional delineation and differentiation dynamics of  
39 human CD4+ T cells expressing the FoxP3 transcription factor.  
40 *Immunity* 30: 899-911.

- 1 53. Weissler, K. A., and A. J. Caton. 2014. The role of T-cell receptor  
2 recognition of peptide:MHC complexes in the formation and activity of  
3 Foxp3(+) regulatory T cells. *Immunological reviews* 259: 11-22.
- 4 54. Miragaia, R. J., T. Gomes, A. Chomka, L. Jardine, A. Riedel, A. N.  
5 Hegazy, I. Lindeman, G. Emerton, T. Krausgruber, J. Shields, M.  
6 Haniffa, F. Powrie, and S. A. Teichmann. 2017. Single cell  
7 transcriptomics of regulatory T cells reveals trajectories of tissue  
8 adaptation. *bioRxiv*.
- 9 55. Tai, X., B. Erman, A. Alag, J. Mu, M. Kimura, G. Katz, T. Guinter, T.  
10 McCaughy, R. Etzensperger, L. Feigenbaum, D. S. Singer, and A.  
11 Singer. 2013. Foxp3 transcription factor is proapoptotic and lethal to  
12 developing regulatory T cells unless counterbalanced by cytokine  
13 survival signals. *Immunity* 38: 1116-1128.
- 14 56. Sahni, H., S. Ross, A. Barbarulo, A. Solanki, C. I. Lau, A. Furmanski, J.  
15 I. Saldana, M. Ono, M. Hubank, M. Barenco, and T. Crompton. 2015. A  
16 genome wide transcriptional model of the complex response to pre-  
17 TCR signalling during thymocyte differentiation. *Oncotarget* 6: 28646-  
18 28660.
- 19 57. Hayatsu, N., T. Miyao, M. Tachibana, R. Murakami, A. Kimura, T. Kato,  
20 E. Kawakami, T. A. Endo, R. Setoguchi, H. Watarai, T. Nishikawa, T.  
21 Yasuda, H. Yoshida, and S. Hori. 2017. Analyses of a Mutant Foxp3  
22 Allele Reveal BATF as a Critical Transcription Factor in the  
23 Differentiation and Accumulation of Tissue Regulatory T Cells.  
24 *Immunity* 47: 268-283 e269.
- 25 58. Kalekar, L. A., S. E. Schmiel, S. L. Nandiwada, W. Y. Lam, L. O.  
26 Barsness, N. Zhang, G. L. Stritesky, D. Malhotra, K. E. Pauken, J. L.  
27 Linehan, M. G. O'Sullivan, B. T. Fife, K. A. Hogquist, M. K. Jenkins,  
28 and D. L. Mueller. 2016. CD4(+) T cell anergy prevents autoimmunity  
29 and generates regulatory T cell precursors. *Nature immunology* 17:  
30 304-314.
- 31 59. Takahashi, T., T. Tagami, S. Yamazaki, T. Uede, J. Shimizu, N.  
32 Sakaguchi, T. W. Mak, and S. Sakaguchi. 2000. Immunologic self-  
33 tolerance maintained by CD25(+)CD4(+) regulatory T cells  
34 constitutively expressing cytotoxic T lymphocyte-associated antigen 4.  
35 *The Journal of experimental medicine* 192: 303-310.
- 36 60. Tang, A. L., J. R. Teijaro, M. N. Njau, S. S. Chandran, A. Azimzadeh,  
37 S. G. Nadler, D. M. Rothstein, and D. L. Farber. 2008. CTLA4  
38 expression is an indicator and regulator of steady-state CD4+ FoxP3+  
39 T cell homeostasis. *Journal of immunology* 181: 1806-1813.
- 40 61. Kenefeck, R., C. J. Wang, T. Kapadi, L. Wardzinski, K. Attridge, L. E.  
41 Clough, F. Heuts, A. Kogimtzis, S. Patel, M. Rosenthal, M. Ono, D. M.  
42 Sansom, P. Narendran, and L. S. Walker. 2015. Follicular helper T cell

1 signature in type 1 diabetes. *The Journal of clinical investigation* 125:  
2 292-303.

3 62. Haghverdi, L., M. Buttner, F. A. Wolf, F. Buettner, and F. J. Theis.  
4 2016. Diffusion pseudotime robustly reconstructs lineage branching.  
5 *Nat Methods* 13: 845-848.

6

7

## 1 **Figure Legends**

2

### 3 **Figure 1. Identification of the activation signature in Treg and Tmem by** 4 **CCA of T cell populations**

5 The microarray dataset of peripheral CD4+ T cells, including naïve, effector  
6 and memory phenotype from various sites (GSE15907), was analysed using  
7 the T cell activation variable, which was obtained by the microarray dataset of  
8 conventional activated CD4+ T cells (GSE42276). **(A)** Schematic  
9 representation of CCA for the cross-level analysis of T cell population (Cell),  
10 immunological process, and genes. CD4+ T cell populations and  
11 immunological processes. **(B)** CCA was applied to the T cell population data  
12 using an explanatory variable for T cell activation, which was obtained as fold  
13 change between activated and resting conventional CD4+ T cells. The CCA  
14 solution is thus one-dimensional, and is used as “T cell activation score” (see  
15 Methods).

16

### 17 **Figure 2. Identification of the Foxp3-independent activation signature in** 18 **Treg by CCA of T cell populations**

19 The microarray dataset of peripheral CD4+ T cells (GSE15907) was analysed  
20 using the T cell activation variable and the variables for retroviral *Foxp3*  
21 transduction and *Runx1* transduction as explanatory variables. **(A)** The CCA  
22 solution was visualised by a biplot where CD4+ T cell samples are shown by  
23 closed circles (see legend) and the explanatory variables are shown by blue  
24 arrows. Percentage indicates that of the variance accounted for by the inertia

1 of the axes (i.e. the amount of information (eigenvalue) retained in each axis).  
2 **(B)** Gene biplot of the 2D CCA solution in (C) showing the relationships  
3 between genes (grey circles) and the explanatory variables (blue arrows).  
4 Selected key genes are annotated.

5

6 **Figure 3. Differential regulations of transcriptional modules for**  
7 **activation in Treg and Tmem by Foxp3 and Runx1.**

8 **(A)** Definition of Tact-Foxp3 genes and Tact-Runx1 genes. In the gene plot of  
9 the CCA solution in Figure 1D, Axis 1-low genes (25 percentile low) were  
10 designated as *activation genes*, which were further classified into Tact-Foxp3  
11 genes and Tact-Runx1 genes by Axis 2, which have high correlations to Treg  
12 and Tmem samples, respectively, in the CCA cell space (c.f. Figure 1C). **(B)**  
13 Heatmap analysis of all the Tact-Foxp3 genes. **(C)** Heatmap analysis of all the  
14 Tact-Runx1 genes. **(D)** Heatmap analysis of selected Tact-Foxp3 genes. **(E)**  
15 Heatmap analysis of selected Tact-Runx1 genes.

16

17 **Figure 4. A model for the differential regulation of activation genes in**  
18 **Treg and Tmem.**

19 The proposed differential regulations of TCR signal downstream genes in  
20 Treg and Tmem. Since both naturally-arising Treg and Tmem are self-reactive  
21 T cells, they may frequently receive tonic TCR signals by recognising their  
22 cognate antigens in the periphery. This results in the full activation of both the  
23 Tact-Foxp3 and Tact-Runx1 gene modules in Tmem. However, in Treg,  
24 Foxp3 represses Tact-Runx1 genes and sustains the expression of Tact-  
25 Foxp3 genes, producing the characteristic Treg transcriptome.

1

2 **Figure 5. The activation signature of Treg is dependent on TCR**  
3 **signalling.**

4 (A) The experimental design for the TCR dataset. CD44<sup>hi</sup> activated Treg and  
5 CD44<sup>lo</sup> naïve-like Treg were obtained from TCRa KO or WT mice and  
6 analysed for transcriptome analysis. (B) CCA was applied to the  
7 transcriptome data of CD44<sup>lo</sup>CD62<sup>hi</sup> naïve-like and CD44<sup>hi</sup>CD62<sup>lo</sup> activated  
8 Treg cell populations from inducible *TCRa* KO or WT (from the *TCR KO* data,  
9 GSE61077), using the T cell activation variable as the explanatory variable.  
10 This produces a 1D CCA solution, and the sample score was plotted  
11 (representing “T cell activation score”). (C) The experimental design for the  
12 activated Treg dataset. Bone marrow (BM) cells were obtained from  
13 *Foxp3*<sup>GFP</sup>*CreERT2*;*Rosa26YFP* mice (YFP mice), and transferred into *Foxp3*<sup>GFP</sup>  
14 *DTR* mice (Foxp3-DTR mice), in order to make BM chimera, in which ~10% of  
15 Treg expressed DTR. Subsequently, DT was administered to these BM  
16 chimera, which depleted Foxp3-DTR cells but not donor cells. This treatment  
17 induced a transient activation of T cells and inflammation *in vivo*. Activated  
18 Treg (aTreg) were obtained from these mice with inflammation, while resting  
19 Treg (rTreg) were from control mice, and memory Treg (mTreg) were from the  
20 mice after the resolution of inflammation. (D) 1D CCA sample score plot of  
21 transcriptomic data of resting Treg (rTreg), *in vivo* activated Treg (aTreg) and  
22 memory Treg (mTreg) from the *aTreg* data (GSE83315), with T cell activation  
23 signature as explanatory variable.

24

1 **Figure 6. The comparative analysis of Tmem-specific and Treg-Tmem**  
2 **shared activation genes and TCR-dependent and activated Treg-specific**  
3 **genes.**

4 (A) Venn diagram analysis of TCR genes (DEGs between TCRa KO and WT  
5 Treg), activated Treg genes (DEGs between aTreg and rTreg), and Tact-  
6 Foxp3 and Tact-Runx1 genes (see Figure 3). (B) Pie chart showing the  
7 number of the genes in the intersect between the TCR genes and either Tact-  
8 Foxp3 or Tact-Runx1 genes, and that of the rest (designated as TCR-specific  
9 genes). (C) Pie chart showing the numbers of aTreg gene-specific genes and  
10 the intersects with Tact-Foxp3 and Tact-Runx1 genes (D) Pathway analysis of  
11 the gene clusters in (C). The colours of texts correspond to the ones in the  
12 Venn Diagram in (C). The gene clusters that are not shown did not have any  
13 enrichment.

14

15

16 **Figure 7. Single cell CCA of melanoma-infiltrating T cells determines the**  
17 **activation status of individual T cells and identifies a putative Tfh-like**  
18 **process**

19 (A) Schematic representation of CCA of CD4+ T cell single cell  
20 transcriptomes analysed by two explanatory variables: activated naïve T cells  
21 (Tact) and resting naïve T cells (Trest). (B) CCA biplot showing the  
22 relationship between Treg and non-Treg T cells (sample scores) and the  
23 explanatory variables (Tact and Trest). Axis 1 represents the difference  
24 between Tact and Trest, and thus, Activated T cells and Resting T cells were  
25 defined by the CCA Axis 1 score, and these cells were further classified into

1 Treg and non-Treg by their *FOXP3* expression (see legend). Percentage  
2 indicates that of the variance (inertia) accounted for by the axis. **(C)** Violin plot  
3 showing the CCA activation scores (Axis 1 score  $\times$  -1) of FOXP3- and  
4 FOXP3+ cell groups. Asterisk indicates statistical significance by Mann-  
5 Whitney test **(D)** Violin plot showing the CCA activation scores of Activated  
6 (Act.) and Resting (Rest.) FOXP3- and FOXP3+ cell groups. Asterisks  
7 indicate the values of post-hoc Dunn's test following a Kruskal Wallis test. \*\*\*  
8  $p < 0.005$ . **(E)** Gene biplot of the CCA solution in (B) showing the relationships  
9 between genes (grey circles) and the Tact and Trest explanatory variables  
10 (blue arrows). Genes are shown by grey circles, and well-known genes that  
11 are key for T cell activation processes are annotated.

12

13

14 **Figure 8. SC4A identifies the bifurcation point of activated T cells that**  
15 **leads to Tfh-like and Treg differentiation in tumour-infiltrating T cells**

16 SC4A was applied to the single cell data of tumour-infiltrating T cells, and 4  
17 genes (CTLA-4, CCR7, FOXP3, and PDCD1) were chosen as explanatory  
18 variables to represent the T cell activation, resting, FOXP3-driven process,  
19 and Tfh-like process. **(A)** The design of analysis. The single cell data from the  
20 melanoma sample were analysed by SC4A to identify the most effective  
21 combination of explanatory variables for dispersing the 4 presumptive T cell  
22 populations identified in Figure 7. These genes were used as explanatory  
23 variables to analyse the rest of the single cell data as main dataset. Thus, the  
24 single-cell level dynamics of T cell differentiation and activation are modelled  
25 by the key biological processes that are represented by the T cell populations  
26 and explanatory variables. **(B)** Single cell sample space of the final SC4A



1 output showing correlations between single cell samples and the explanatory  
2 variables **(C)** Gene space of the final SC4A output showing correlations  
3 between genes and the explanatory variables. The genes that showed high  
4 correlations to the PDCD1, CTLA4, and FOXP3 variables were identified as  
5 Tfh-like genes, Activation genes, and FOXP3-driven genes, respectively. **(D)**  
6 The identification of two differentiation processes as lineages and a  
7 bifurcation point. The cells in the sample space of the SC4A output **(B)** were  
8 classified into 6 clusters by an unsupervised clustering algorithm. These  
9 clusters were further analysed for pseudotime inference. **(E-G)** The average  
10 gene expression was plotted against each pseudotime (upper: FOXP3-  
11 pseudotime; lower: Tfh-pseudotime). The bifurcation point (Cluster 2) is  
12 emphasised by broken lines. The number in circle indicate the cluster number.  
13 Gene expression was standardised, and the sum of the standardised  
14 expression was obtained for **(E)** Activation genes, **(F)** FOXP3-driven genes,  
15 and **(G)** Tfh-like genes (see C). **(H-L)** The expression of key genes was  
16 plotted against each pseudotime.

17

18 **Figure 9. Identification of the conserved genes for the differential**  
19 **regulation of Tfh-like and Treg differentiation in activated T cells**

20 **(A)** The identified lineage curves and the bifurcation point in the tumour-  
21 infiltrating T cells. The number in circle indicates the cluster number in Figure  
22 8D. **(B-D)** The expression of selected feature genes was plotted against each  
23 pseudotime. Genes are from the intersect of **(B)** Activation genes (Figure 8C)  
24 and Tact-Foxp3 genes (Figure 3), **(C)** FOXP3-driven genes (Figure 8C) and  
25 Tact-Foxp3 genes, and **(D)** Tfh-like genes (Figure 8C) and Tact-Runx1 genes

1 (Figure 3). (E) The expression of selected genes in the tumour-infiltrating T  
2 cells were shown by a 2-dimensional plot in a flow cytometric style. Data from  
3 Treg-lineage cells (the cluster 5 and 6, upper panels) and Tfh-like lineage  
4 cells (the cluster 3 and 4, lower panels). The gene in x-axis (NFAT5) is from  
5 the activation gene group (B), while y-axis shows genes from either the  
6 FOXP3-Treg group (C) or the Tfh-like/Tmem group (D). Thresholds and  
7 quadrant gates were determined in an empirical manner using density plot.  
8

| Accession number | Short description | Reference                                                  | Description of animal models                                                                                                                         | Timing of cell harvest | Cell purification strategy and sorting markers                                                                                                                                                                                                                                                                                                                                                                                                                                                                                                                                                                                                                                                                                                                                                                                                                                   | Tissue origin                                            |
|------------------|-------------------|------------------------------------------------------------|------------------------------------------------------------------------------------------------------------------------------------------------------|------------------------|----------------------------------------------------------------------------------------------------------------------------------------------------------------------------------------------------------------------------------------------------------------------------------------------------------------------------------------------------------------------------------------------------------------------------------------------------------------------------------------------------------------------------------------------------------------------------------------------------------------------------------------------------------------------------------------------------------------------------------------------------------------------------------------------------------------------------------------------------------------------------------|----------------------------------------------------------|
| GSE15907         | T cell subsets    | Immunological Genome Project; Painter <i>et al.</i> , 2011 | Primary cells from multiple immune lineages are isolated <i>ex-vivo</i> , primarily from young adult B6 male mice, and double-sorted to >99% purity. | 6 weeks                | <p>FACS;</p> <p>Treg: Foxp3, CD4, CD25, GFP</p> <p>CD4 Tmem (scLN): TCRb CD44<sup>high</sup> CD122<sup>lo</sup> CD4</p> <p>CD4 Tmem (spleen): CD4+ CD8- CD25- CD44<sup>hi</sup> CD122<sup>lo</sup></p> <p>CD4 Tmem ( ) CD44<sup>hi</sup> 62L<sup>o</sup></p> <p>Activated Tmem44<sup>hi</sup> 62L<sup>lo</sup> (spleen): CD4 TCRb CD44<sup>hi</sup> CD62L<sup>lo</sup></p> <p>Naïve CD4 (scLN): CD4+ CD8- CD25- 62L<sup>hi</sup> 44<sup>lo</sup></p> <p>Naïve CD4 (mLN): CD4+ CD8- CD25- 62L<sup>hi</sup> 44<sup>lo</sup></p> <p>Naïve CD4 (PP): TCR+ CD4+ CD44<sup>lo</sup> CD62L<sup>hi</sup></p> <p>Naïve CD4 (spleen): CD4+ CD8- CD25- 62L<sup>hi</sup> 44<sup>lo</sup></p> <p>CD4+ BDC (scLN): CD4+ CD8- BDC+</p> <p>CD4+ BDC (pancreas): CD4+ CD8- BDC+</p> <p>CD4+ BDC (pancreatic LN): CD4+ CD8- BDC+</p> <p>Foxp3-Tnaive (spleen): CD4+ CD8- GFP- CD44<sup>lo</sup></p> | Spleen, subcutaneous LNs, mesenteric LN, Peyer's patches |

|          |                   |                                     |                                                                                                                                                                                                                                                                                                                                                                                                                                                                                                                              |                                                                      |                                    |                                   |
|----------|-------------------|-------------------------------------|------------------------------------------------------------------------------------------------------------------------------------------------------------------------------------------------------------------------------------------------------------------------------------------------------------------------------------------------------------------------------------------------------------------------------------------------------------------------------------------------------------------------------|----------------------------------------------------------------------|------------------------------------|-----------------------------------|
| GSE83315 | aTreg data        | Van der Veeken <i>et al.</i> , 2016 | Diphtheria toxin (DT) was administered to Foxp3 <sup>GFP-DTR</sup> mice to deplete Treg cells and induce expansion/activation of pro-inflammatory effector CD4+ T cells. After DT clearance, new Treg cells are generated. Mixed bone marrow chimeras generated with 90% Foxp3-GFP-DTR /10% Foxp3-GFP-CRE-ERT2XR26Y bone marrow were used to deplete 90% of Treg (thereby inducing inflammation and generation of <i>de novo</i> activated Treg) and irreversibly label 10% remaining inflammation-experienced Treg (mTreg). | Day 0 ('resting Treg), day 11 (activated Treg), day 60 (memory Treg) | FACS; CD4, Foxp3, CD44, CD62L, GFP | Spleen and peripheral lymph nodes |
| GSE61077 | TCR KO data       | Levine <i>et al.</i> , 2014         | 8-10 week mice from TracFL x Foxp3 <sup>YFP-Cre</sup> (tamoxifen-inducible deletion of TCR in Treg. Tamoxifen was administered on days 0 and 1.                                                                                                                                                                                                                                                                                                                                                                              | Day 9 after tamoxifen administration                                 | FACS TCRβ, CD4, Foxp3, CD44, CD62L | Lymph nodes                       |
| GSE42276 | T cell activation | Wakamatsu <i>et</i>                 | Conventional CD4+ T cells                                                                                                                                                                                                                                                                                                                                                                                                                                                                                                    | 8 weeks                                                              | FACS;                              | Spleen, lymph node                |

|         |                       |                          |                                                                                                                                                                                                                                                                                                                                                                                                                                                                                                                                                                                                                    |                             |                                   |                        |
|---------|-----------------------|--------------------------|--------------------------------------------------------------------------------------------------------------------------------------------------------------------------------------------------------------------------------------------------------------------------------------------------------------------------------------------------------------------------------------------------------------------------------------------------------------------------------------------------------------------------------------------------------------------------------------------------------------------|-----------------------------|-----------------------------------|------------------------|
|         |                       | <i>al.</i> , 2013        | <p>from C57BL/6J male mice were stimulated by anti-CD3 and anti-CD28 for 20h and 48h and data were pooled.</p> <p>0h unstimulated samples were used as control.</p>                                                                                                                                                                                                                                                                                                                                                                                                                                                |                             | DAPI-CD45R-CD8a-CD11b/c-CD4+ GFP+ |                        |
| GSE6939 | RV-transduced T cells | Ono <i>et al.</i> , 2007 | <p>Primary CD4+ T cells were obtained from BALB/c mice and purified into CD4+ naive T cells (GITR<sup>low</sup>CD25-CD4+). CD4+ naive T cells were activated by... and retrovirally gene transduced with Runx1 (AML1), wild type Foxp3, and empty vector as control.</p> <p>Mice: BALB/c, ~8 weeks old.</p> <p>Cells: CD25-GITR<sup>low</sup>CD4+ cells were isolated from lymph nodes and spleen, and stimulated by mitomycin-treated Thy1(-) splenocytes and anti-CD3 antibody. On the following day, cells were transfected by retrovirus carrying either Foxp3 or Runx1. Two days after transduction, GFP+</p> | 60 hours after transfection | FACS ; GFP                        | Lymph nodes and spleen |

|          |                                                     |                             |                                                                                                                                                                                                                                                                                                                                                                                                                |                                                             |                             |  |
|----------|-----------------------------------------------------|-----------------------------|----------------------------------------------------------------------------------------------------------------------------------------------------------------------------------------------------------------------------------------------------------------------------------------------------------------------------------------------------------------------------------------------------------------|-------------------------------------------------------------|-----------------------------|--|
|          |                                                     |                             | cells were sorted..                                                                                                                                                                                                                                                                                                                                                                                            |                                                             |                             |  |
| GSE72056 | Single cell analysis of tumour-infiltrating T cells | Tirosh <i>et al.</i> , 2016 | Single cell RNA-seq analysis of human melanoma tumour samples. Freshly resected samples were disaggregated to generate single cell suspensions of mixed cells of unknown identities. Individual viable immune (CD45+) and nonimmune (CD45-) cells (including malignant and stromal cells) were recovered from the single cell suspension by flow cytometry. Single cells were profiled by single-cell RNA-seq. | Single cells were obtained within 45min of tumour resection | FACS; CD45                  |  |
| GSE15390 | Human activated T cells and Treg                    | Beyer <i>et al.</i> , 2011  | Conventional CD4+ T cells were obtained from whole blood of healthy human donors. T cells were activated for 5 days with CD3+CD28-coated beads; unstimulated naïve T cells as control.                                                                                                                                                                                                                         | 5 days                                                      | MACS/FACS; CD4, CD25, CD127 |  |

## Figure 1

A

### Gene-oriented CCA of T cell populations and immunological processes

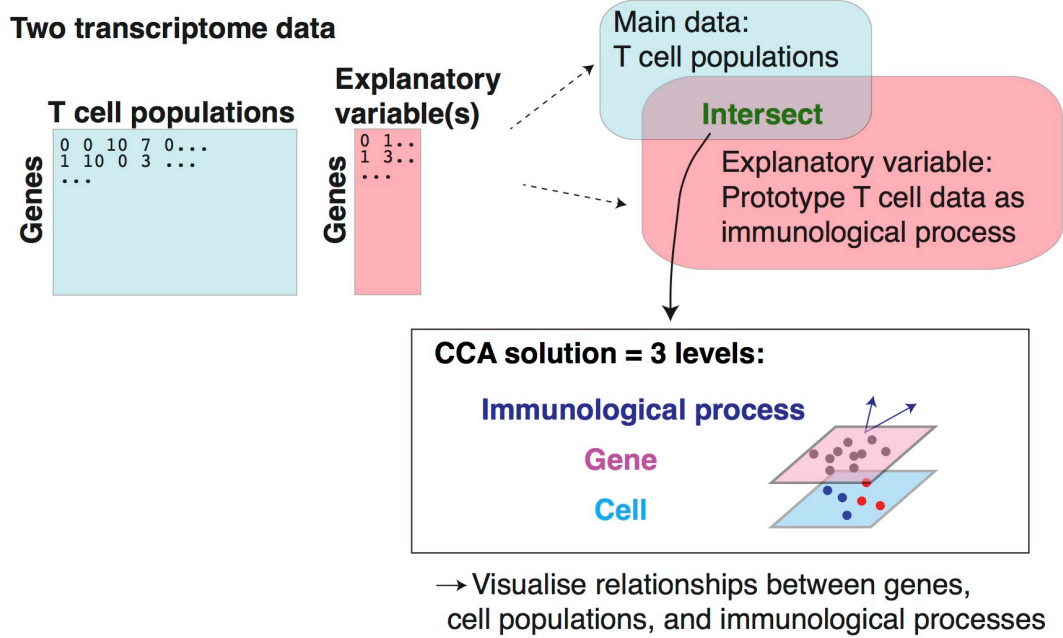

B

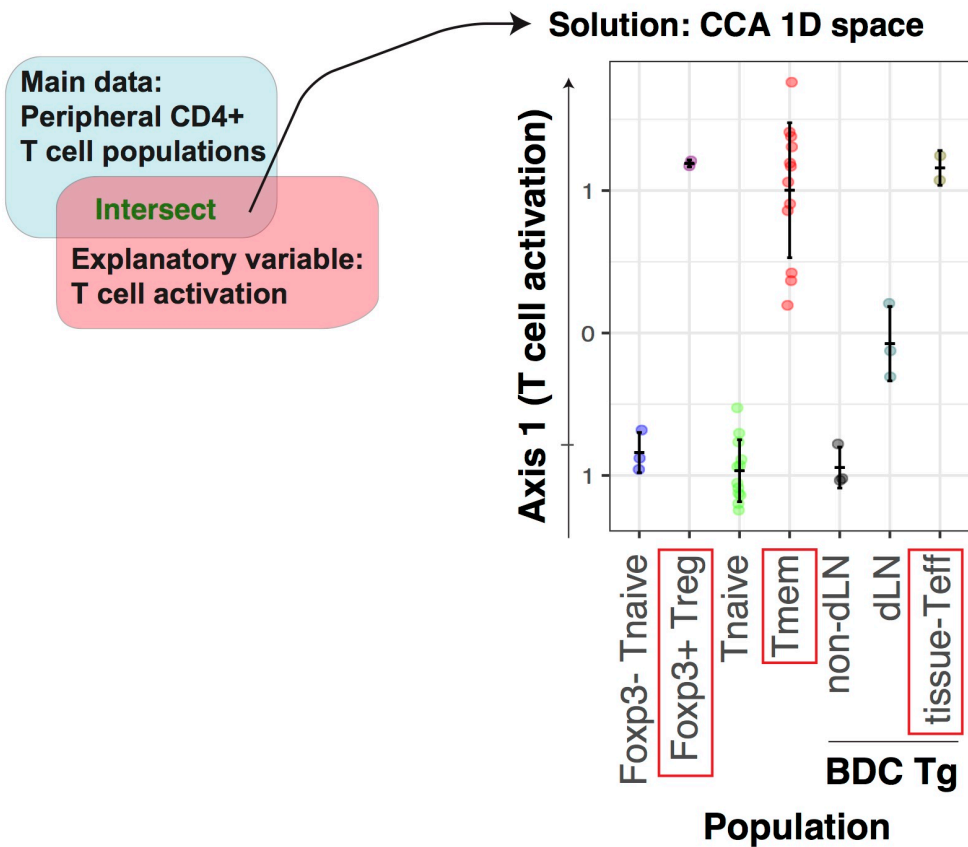

## Figure 2

**A**

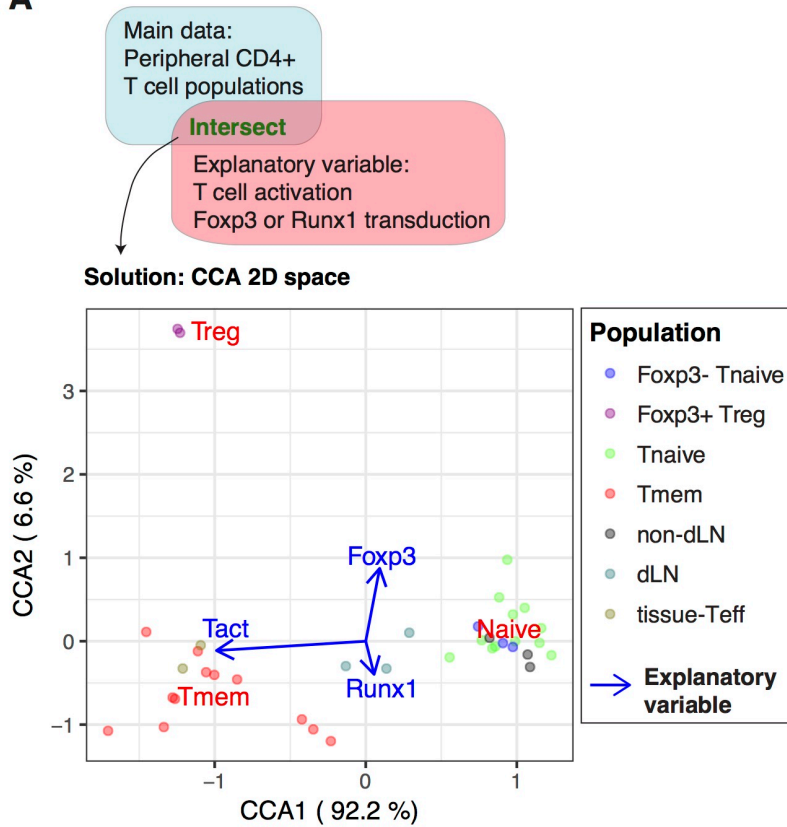

**B**

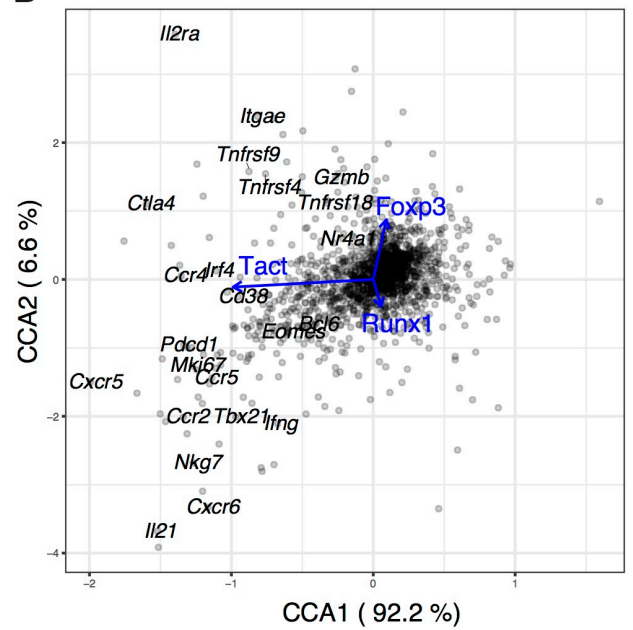



**Figure 3**

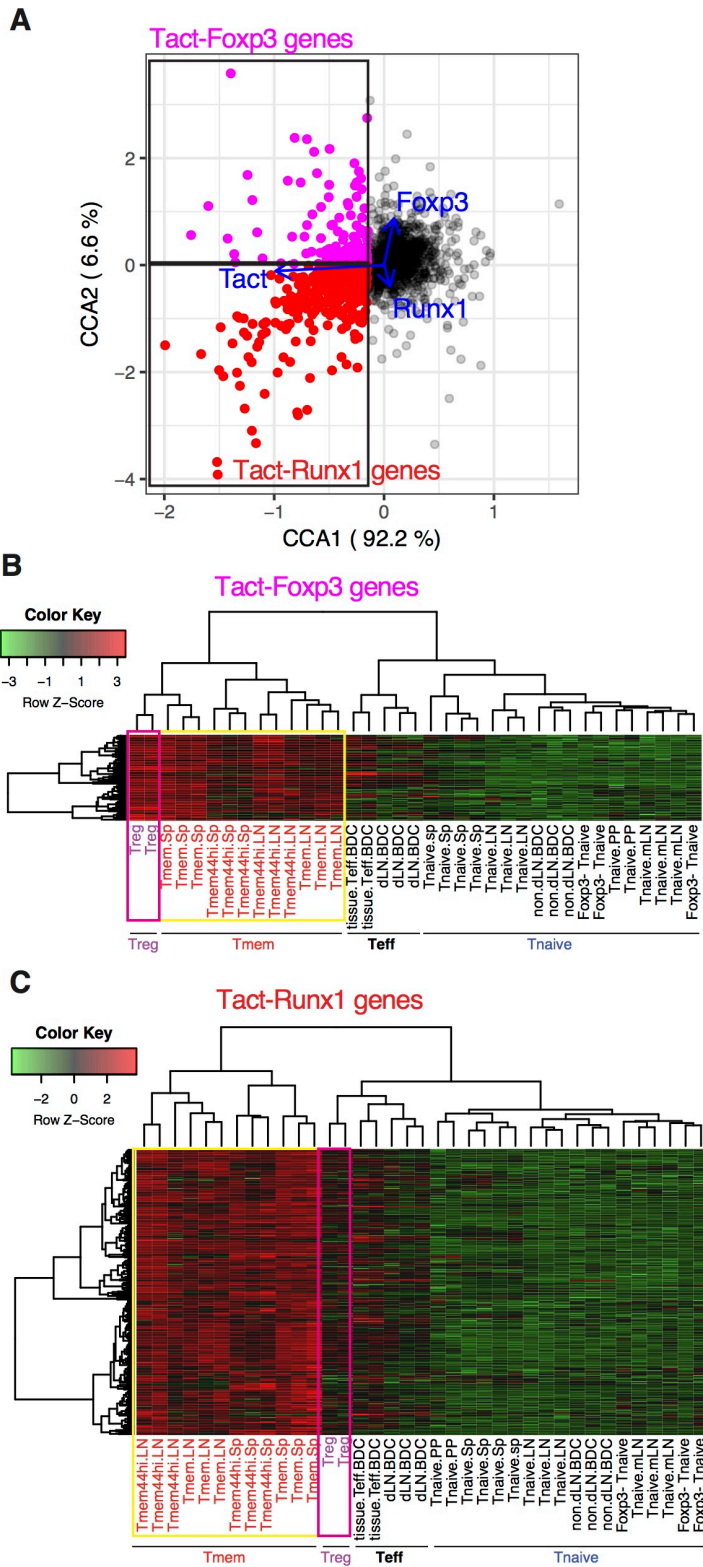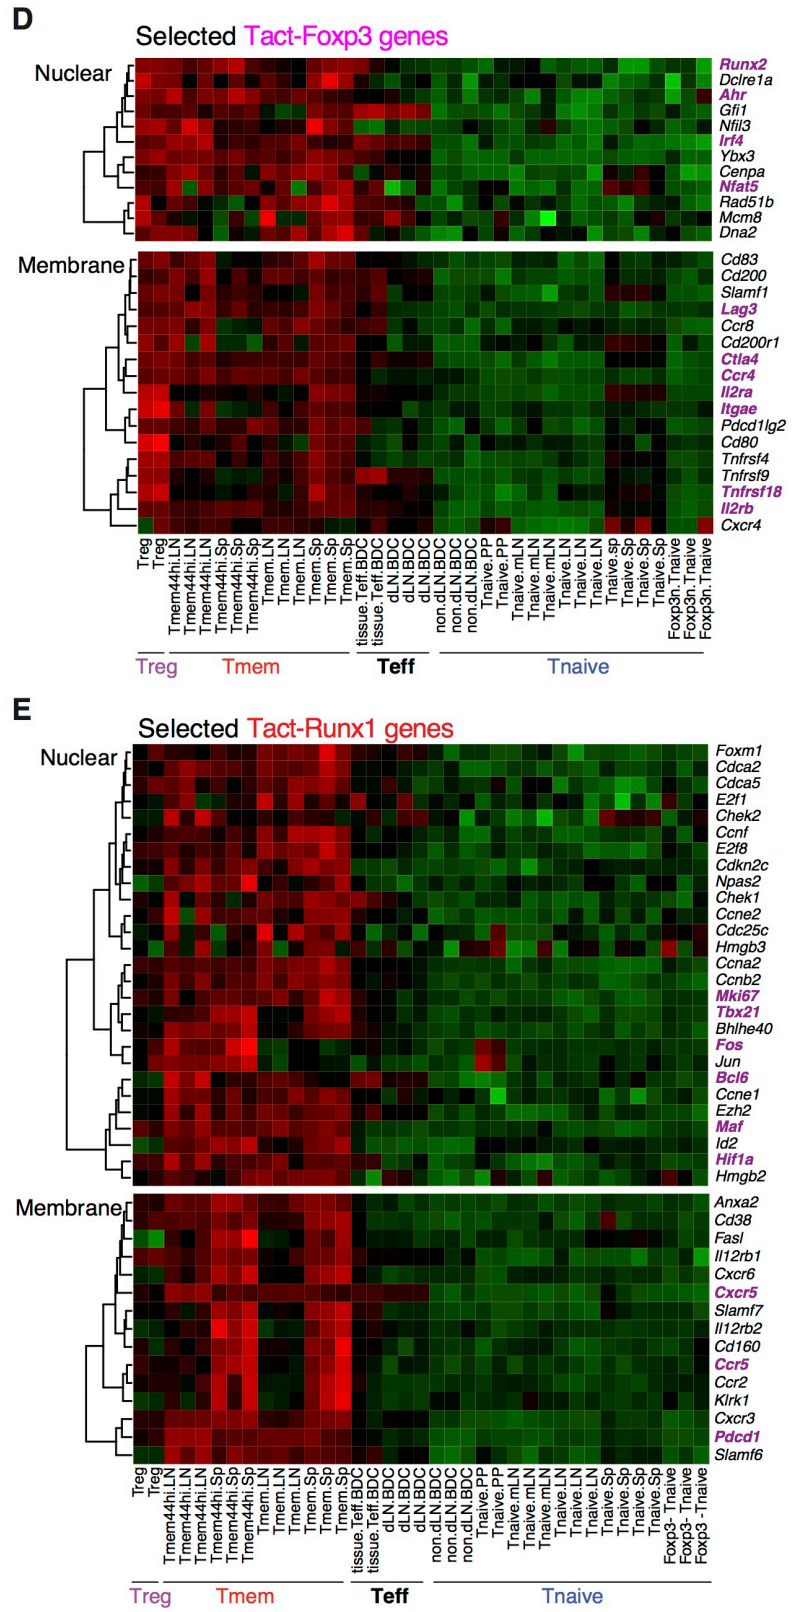

**Figure 4**

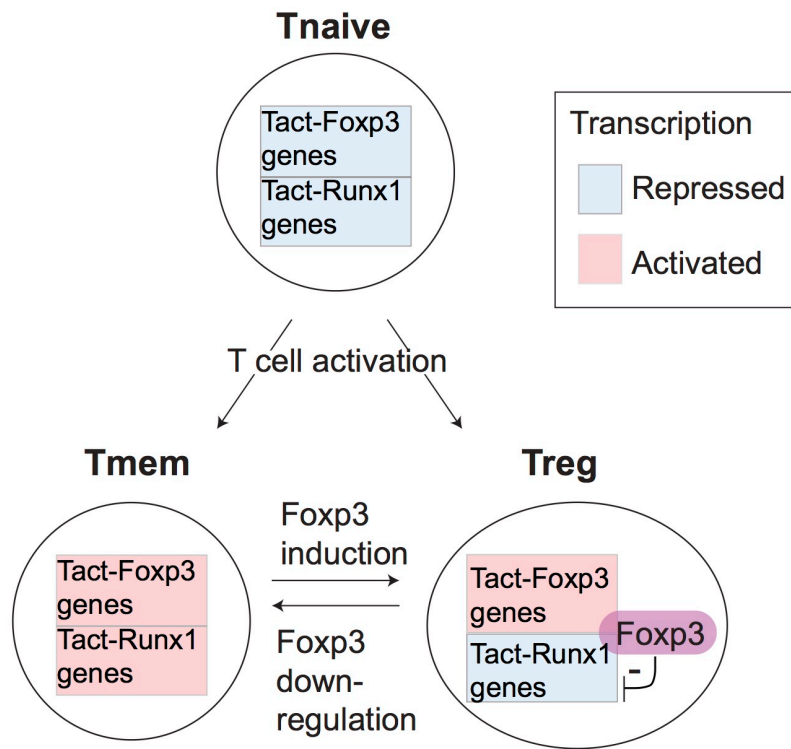

Figure 5

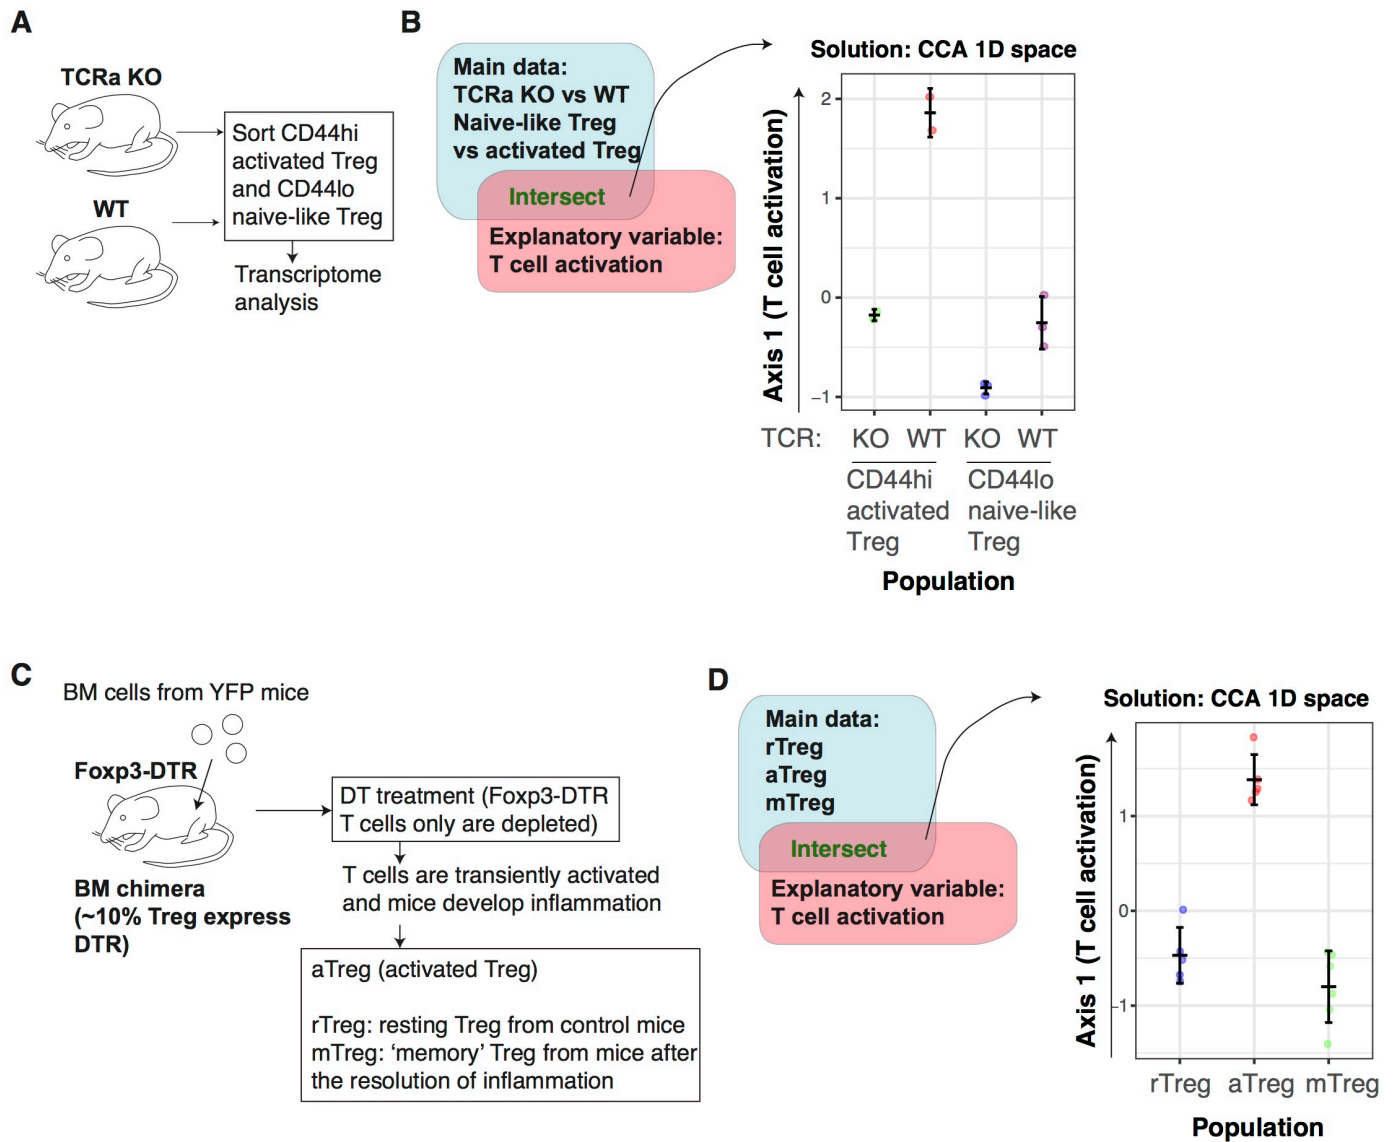

## Figure 6

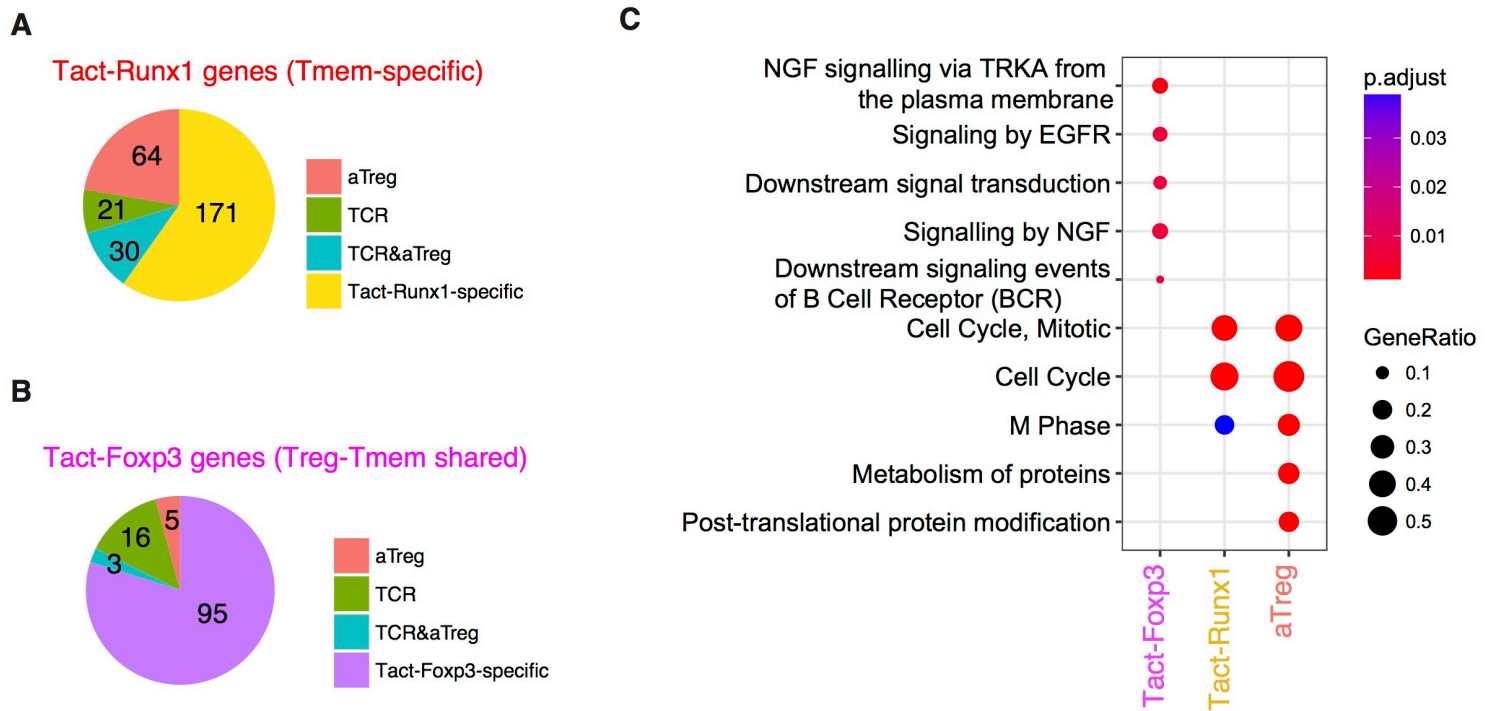

## Figure 7

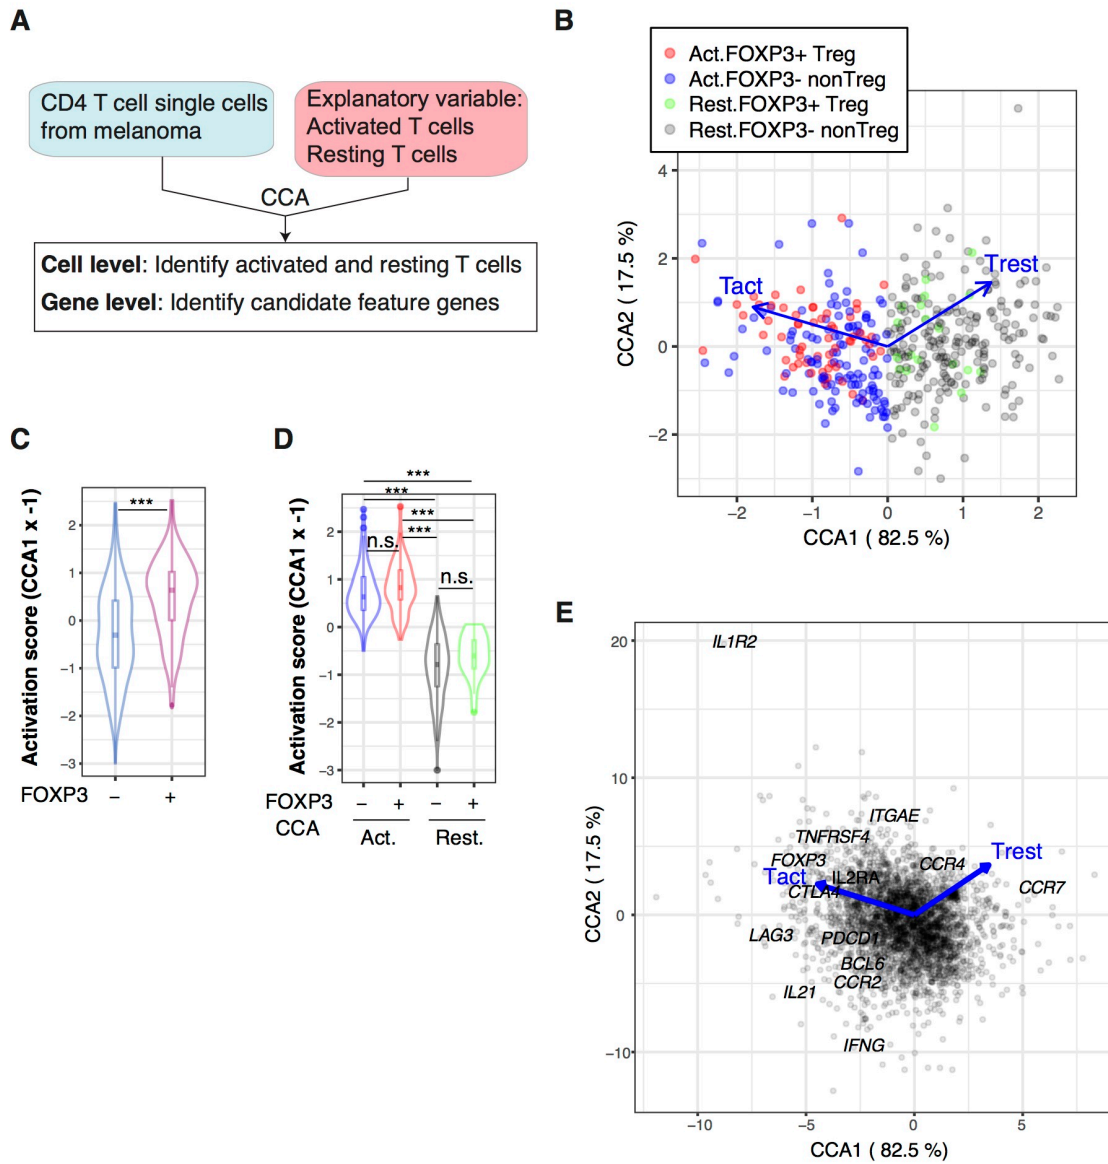

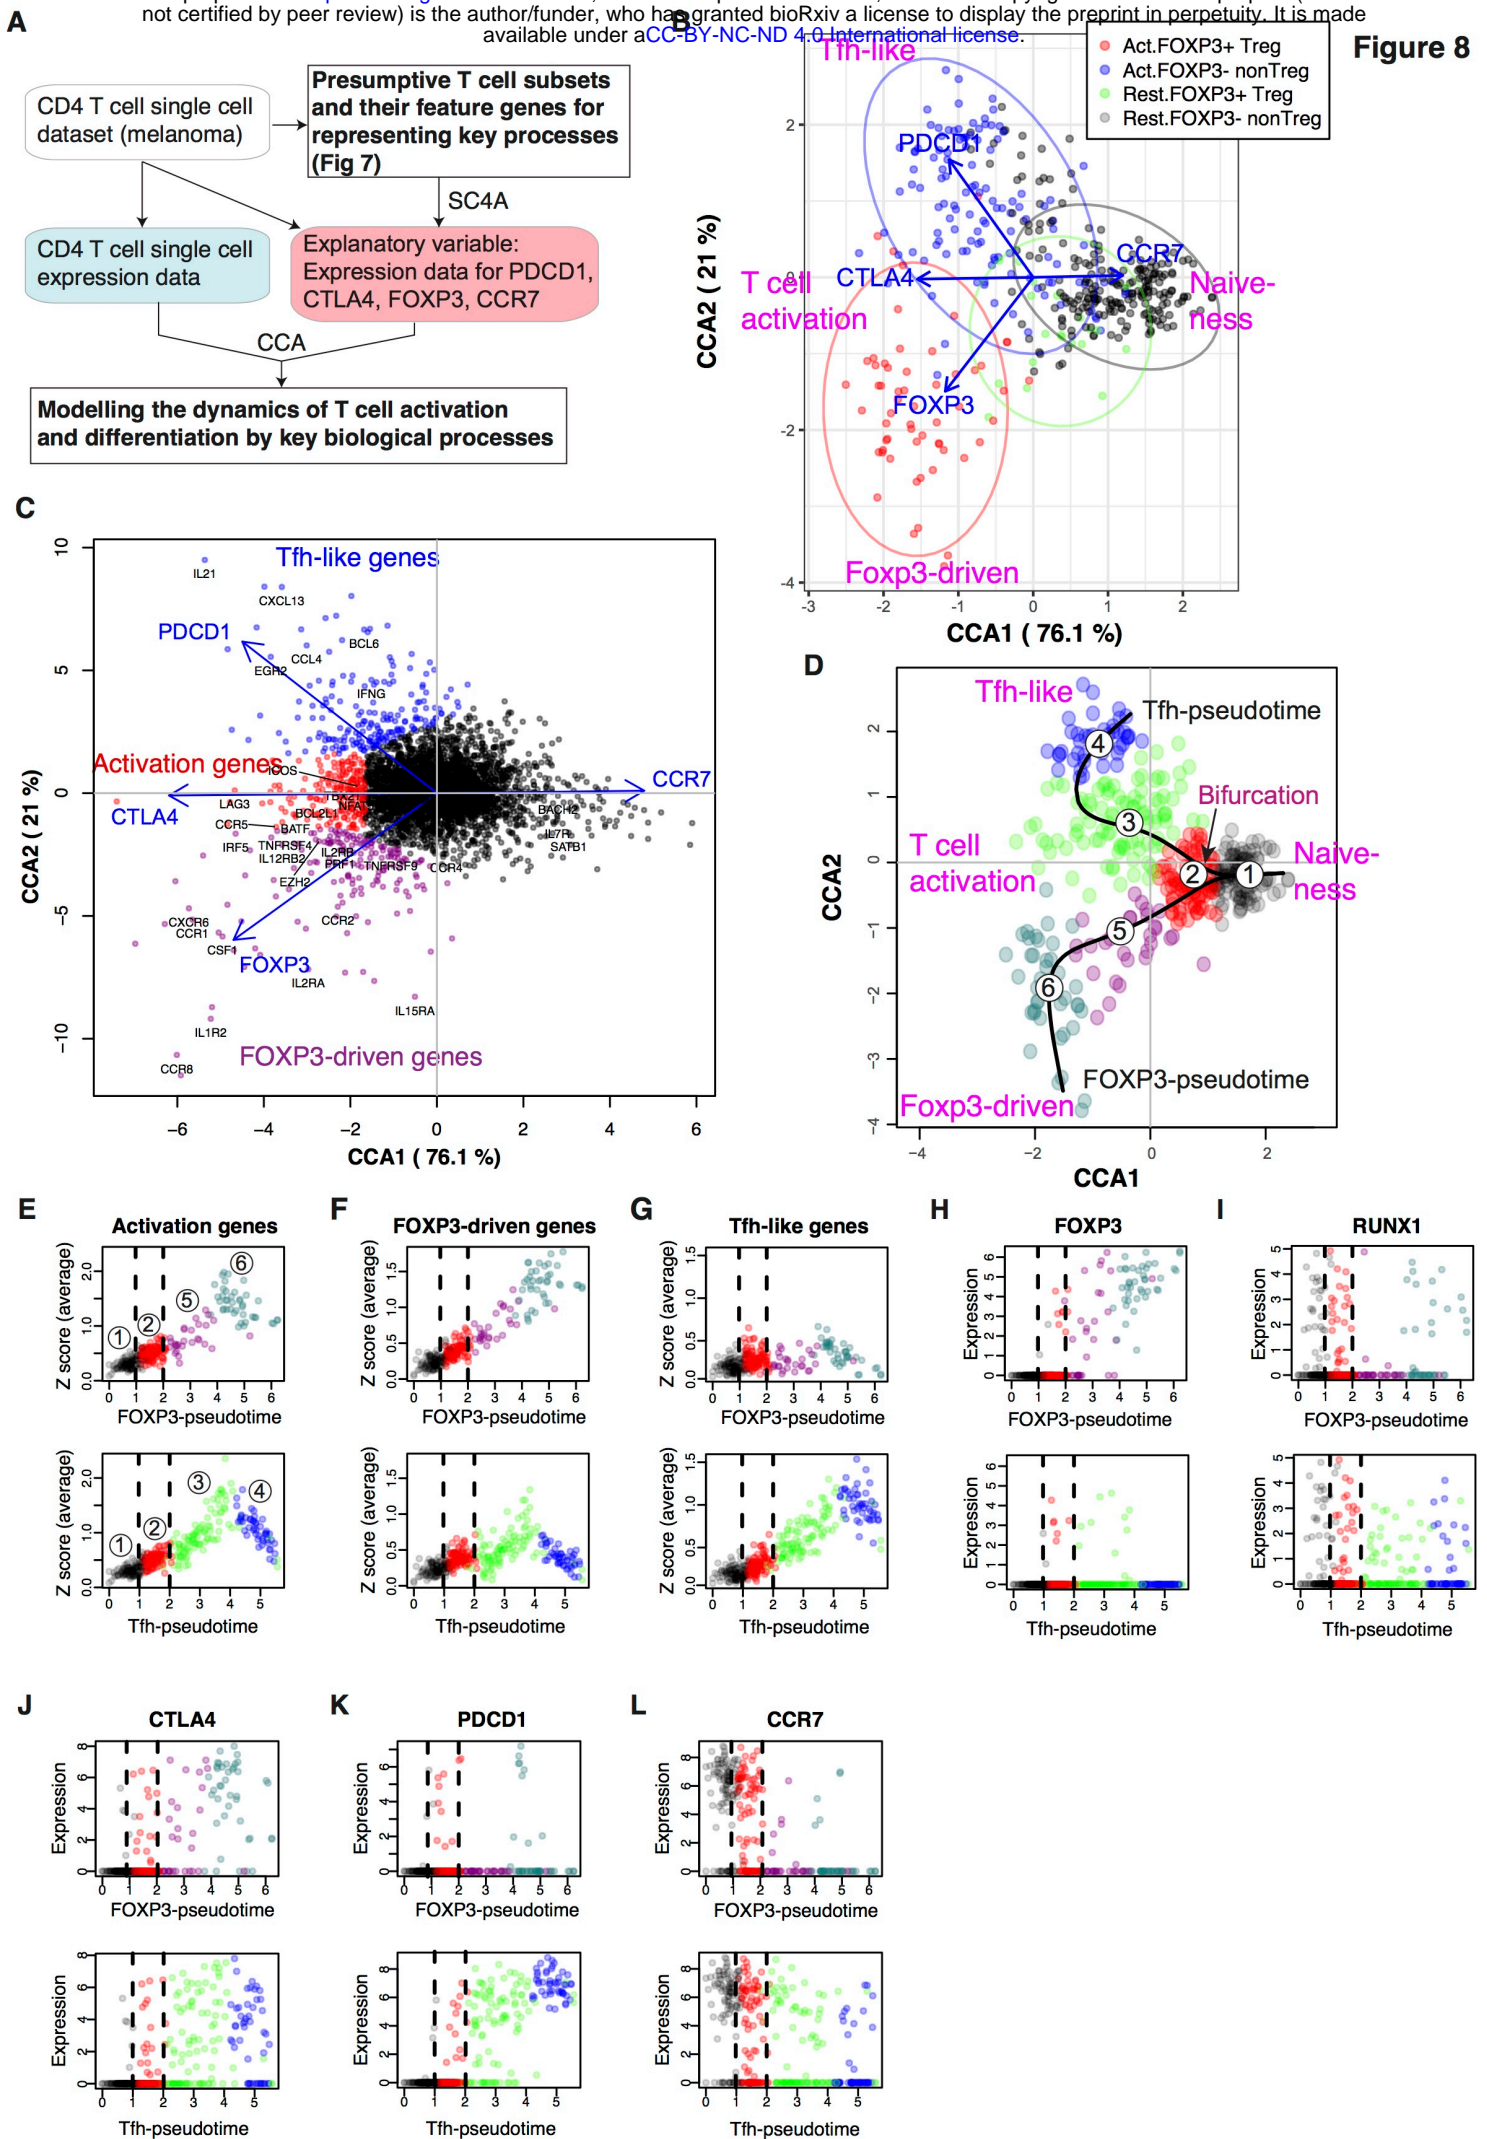

**Figure 9**

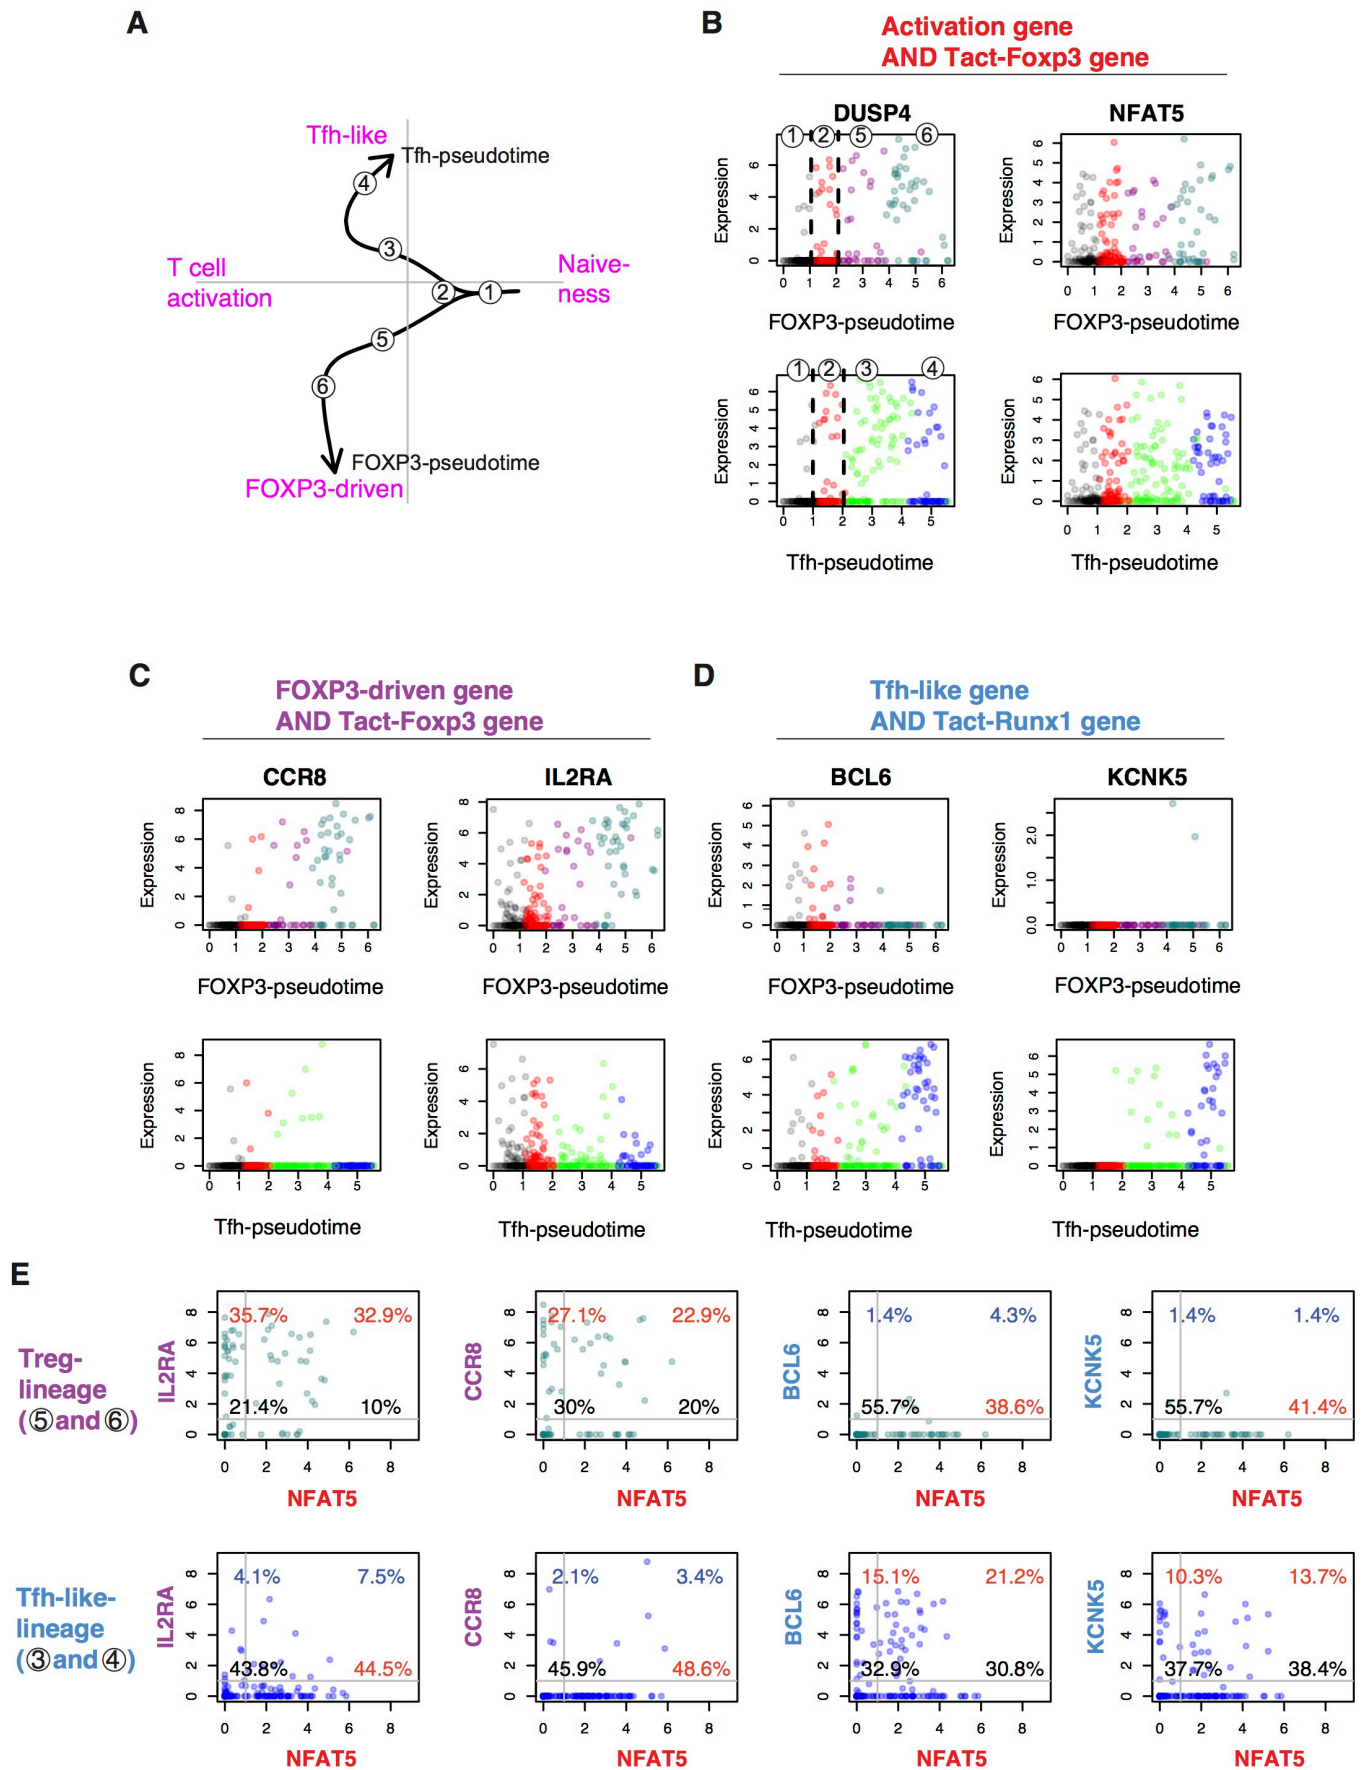

Source: http://biorxiv.org/content/10.1101/280818v1.full.pdf
